1 **Mitochondrial hypoxic stress induces widespread RNA editing by APOBEC3G in lymphocytes**

2

3 Shraddha Sharma<sup>1</sup>, Jianmin Wang<sup>2</sup>, Scott Portwood<sup>3</sup>, Eduardo Cortes-Gomez<sup>2</sup>, Orla Maguire<sup>4</sup>,

4 Per H. Basse<sup>3</sup>, Eunice S. Wang<sup>3</sup>, Bora E. Baysal<sup>1\*</sup>

5

6 Department of Pathology and Laboratory Medicine<sup>1</sup>, Department of Bioinformatics and

7 Biostatistics<sup>2</sup>, Department of Medicine<sup>3</sup> and Department of Flow and Image Cytometry<sup>4</sup>,

8 Roswell Park Comprehensive Cancer Center, Buffalo, NY 14263, USA

9

10 Email: [shraddha.sharma@roswellpark.org](mailto:shraddha.sharma@roswellpark.org), [jianmin.wang@roswellpark.org](mailto:jianmin.wang@roswellpark.org),

11 [scott.portwood@roswellpark.org](mailto:scott.portwood@roswellpark.org), [eduardo.cortesgomez@roswellpark.org](mailto:eduardo.cortesgomez@roswellpark.org),

12 [orla.maguire@roswellpark.org](mailto:orla.maguire@roswellpark.org), [per.basse@roswellpark.org](mailto:per.basse@roswellpark.org), [eunice.wang@roswellpark.org](mailto:eunice.wang@roswellpark.org),

13 [bora.baysal@roswellpark.org](mailto:bora.baysal@roswellpark.org)

14

15 \*Corresponding author: Bora E. Baysal

16

17

18

19

20 Keywords: RNA editing, APOBEC3, NK cells, hypoxia, cell stress, mitochondria,

21 epitranscriptome, innate immune cells

22

23

24

25

26 **Abstract**

27 Protein recoding by RNA editing is required for normal health and evolutionary adaptation.  
28 However, *de novo* induction of RNA editing in response to environmental factors is an  
29 uncommon phenomenon. While APOBEC3A edits many mRNAs in monocytes/macrophages in  
30 response to hypoxia and interferons, the physiological significance of such editing is unclear.  
31 Here we show that the related APOBEC3G cytidine deaminase induces site-specific C-to-U  
32 RNA editing in natural killer (NK), CD8+ T cells and lymphoma cell lines upon cellular crowding  
33 and hypoxia. RNASeq analysis of hypoxic NK cells reveals widespread C-to-U recoding mRNA  
34 editing that is enriched for genes involved in mRNA translation. APOBEC3G promotes Warburg-  
35 like metabolic remodeling and reduces proliferation of HuT78 T cells under similar conditions.  
36 Hypoxia-induced RNA editing by APOBEC3G can be mimicked by the inhibition of mitochondrial  
37 respiration, and occurs independently of HIF-1 $\alpha$ . Thus, APOBEC3G is an endogenous RNA  
38 editing enzyme, which is induced by mitochondrial hypoxic stress to promote adaptation in  
39 lymphocytes.

40

41

42

43

44

45

46

47

48

49

50

## 51 **Background**

52

53 RNA editing is an evolutionarily conserved post-transcriptional modification that can result  
54 in amino acid recoding and altered protein function [1]. Protein recoding RNA editing plays an  
55 important role during development and in helping organisms adapt to changes in the  
56 environment. A-to-I (A>I) and C-to-U (C>U) are the two most common types of RNA editing in  
57 mammals, carried out by the ADAR and APOBEC enzymes, respectively.

58

59 The more widespread ADAR-mediated A>I RNA editing, mostly occurs (~98%) in non-  
60 coding repetitive regions [2], likely to combat viral infection and to regulate innate immunity; to  
61 prevent retrotransposon insertion in the genome [3]; or to affect the RNA processing pathway  
62 [4]. Environmental factors such as hypoxia or neural activity can modify the level of A>I editing  
63 in RNAs of certain genes [5, 6], which are already edited under normal physiological conditions  
64 (baseline). Recent studies suggest that the evolutionary acquisition of A>I RNA editing sites can  
65 facilitate temperature adaptation in octopus, flies, and single cell organisms [7-10]. However,  
66 whether or not RNA editing can be dynamically induced at specific sites *de novo* in response to  
67 environmental factors, especially in mammals, is not understood well.

68

69 In mammals, C>U RNA editing by cytidine deamination is infrequent in baseline transcript  
70 sequences under normal physiological conditions. An exception is APOBEC1-mediated RNA  
71 editing, which is mainly involved in the production of short isoform of the ApoB protein in  
72 intestinal cells [11]. The related APOBEC3 (A3) family of enzymes [12, 13], consisting of A3A, -  
73 B, -C, -D, -F, -G and -H are widely considered as antiviral innate restriction factors because they  
74 can mutate foreign genetic material (mainly ssDNA) and inhibit their replication in *in vitro* models  
75 [14]. Recently, we described that APOBEC3A (A3A) induces widespread RNA editing resulting

76 in protein recoding of dozens of genes in primary monocytes when cultured at a high density  
77 under hypoxia (low oxygen) or when exposed to interferons (IFN-1 and IFN- $\gamma$ ), and in M1 type  
78 macrophages as a result of IFN- $\gamma$  treatment [15]. However, the relationship between viral  
79 restriction and cellular RNA editing by A3A, and the functional significance of such editing is  
80 unknown.

81  
82 APOBEC3G (A3G), the most studied member of the A3 family, incorporates into vif-deficient  
83 HIV-1 virions, and inhibits HIV-1 replication in target cells by causing crippling C>U mutations in its  
84 minus ssDNA strand and by inhibiting reverse transcription [14, 16]. Interestingly, we found that  
85 exogenous transient expression of A3G in HEK293T cells causes C>U editing in mRNAs of  
86 hundreds of genes, which are largely distinct from those edited by A3A [17]. While these findings  
87 indicate that the A3G enzyme is capable of RNA editing, whether or not such editing occurs in  
88 primary cells under physiologically relevant conditions is unknown. Therefore, we hypothesized that  
89 A3G-mediated RNA editing will be induced in cells which express this enzyme.

90  
91 In this study, we analyze the cell type specific expression of A3G and identify widespread  
92 RNA editing mediated by A3G, induced by high cell density and hypoxia in NK, CD8+ T cells  
93 and in the widely studied Hut78 T cell line. Our findings reveal that under hypoxic stress, A3G-  
94 mediated RNA editing converges at targets involved in mRNA translation, likely to reorganize  
95 the cellular translation apparatus. Furthermore, we show that A3G promotes adaptation to  
96 hypoxic stress by suppressing cell proliferation and by promoting glycolysis over mitochondrial  
97 respiration. Thus, A3G is a novel endogenous RNA editing enzyme which can facilitate cellular  
98 adaptation to mitochondrial hypoxic cell stress in cytotoxic lymphocytes.

99

100

101 **Results**

102

103 **Cell type specific expression of APOBEC3G**

104 To examine the endogenous RNA editing activity of A3G, we first analyzed A3G's cell  
105 type specific expression levels. Since RNA editing by A3A is observed in cell types that highly  
106 express A3A (monocytes and macrophages), we reasoned that A3G-mediated RNA editing  
107 would be more likely to occur in cells that highly express this enzyme. A meta-analysis of the  
108 publicly available microarray datasets [18] indicated high expression of A3G in gamma delta T  
109 cells, NK cells and CD8+ T cells (in that order, Fig. 1a). Individual gene expression datasets  
110 including GeneAtlas U133A [19] and immune-response *in silico* (IRIS) [20] confirmed a higher  
111 expression of A3G in NK cells relative to T, B lymphocytes and myeloid cells. We experimentally  
112 confirmed high expression levels of A3G in primary NK and CD8+ T cells, but found lower  
113 expression in primary CD4+ T cells purified from peripheral blood (Fig. 1b). These results are  
114 unexpected because prior studies have implied a potential functional role of A3G in restricting  
115 HIV-1 in infected CD4+ T cells [21, 22] whereas other studies did not include NK cells in  
116 APOBEC3 gene expression profiling [23, 24]. In contrast, our findings reveal the highest  
117 expression of A3G in NK and CD8+T lymphocytes that are not infected by HIV-1.

118

119 **Identification of RNA editing by APOBEC3G in NK cells**

120 We have previously shown that A3A, which is highly expressed in monocytes and  
121 macrophages shows very low or the absence of RNA editing in these cells when freshly isolated  
122 from peripheral blood mononuclear cells (PBMCs) [15]. However, RNA editing is induced when  
123 monocytes/macrophages are cultured at a high cell density and low oxygen (hypoxia, 1% O<sub>2</sub>) or  
124 by interferons [15, 25]. Since A3G is highly expressed in NK cells, we hypothesized that RNA  
125 editing will be induced in NK cells when subjected to hypoxia and/or high cell density. We

126 cultured PBMCs for 40 hours at a high cell density ( $5 \times 10^7$  cells in 1.8 ml per well in a 12-well  
127 plate) under normoxia or hypoxia and isolated NK cells. Under these conditions, we observed  
128 upregulation of the phosphorylated  $\alpha$  subunit of the eukaryotic initiation factor-2 (eIF-2 $\alpha$ ) at Ser  
129 51- a conserved event activated in response to various cell stresses including hypoxia [26] at 20  
130 h, suggesting that NK cells were stressed (Fig. 1c). To examine site-specific C>U editing in  
131 RNAs of NK cells, we selected several candidate genes including *TM7SF3* that we have  
132 previously shown high-level RNA editing on overexpressing A3G in 293T cells [17]. *TM7SF3* did  
133 not show any RNA editing in freshly isolated (T0/baseline) NK cells (Fig. 1d). However, we  
134 found evidence for induction of RNA editing in *TM7SF3* due to cellular crowding with/without  
135 hypoxia (higher in hypoxia) (Fig. 1d), which did not further increase with IFN- $\gamma$  treatment  
136 (Additional file 1; Figure S1a). Since A3G is also expressed in CD8+ T cells and to a lesser  
137 extent in CD4+ T cells (Fig. 1a), we cultured PBMCs as mentioned above and isolated NK,  
138 CD8+ and CD4+ cell subsets from the same donors. Site-specific RNA editing (>5%) was  
139 observed in NK cells and to a lesser extent in CD8+ T cells, but not in CD4+ T cells (Fig. 1e), in  
140 parallel with the relative expression levels of A3G in these cell types. Since editing in NK and  
141 CD8+ T cells occurs in RNAs of genes that have been previously shown to be edited in the  
142 293T/A3G overexpression system (*TM7SF3*, *RPL10A*, *RFX7*), our results suggest that A3G  
143 induces RNA editing in cytotoxic lymphocytes, particularly in NK cells.

144

#### 145 **RNASeq analysis of NK cells**

146 To determine the transcriptome-wide targets of C>U RNA editing and their respective  
147 editing level in NK cells, we performed RNASeq analysis. PBMCs (n=3 donors) were cultured at  
148 a high density with/without hypoxia (1% O<sub>2</sub>) and site-specific editing of *TM7SF3* RNA was first  
149 confirmed, which showed higher level of editing in hypoxia relative to normoxia (Fig. 1d). The  
150 three normoxic and three hypoxic NK cells RNA samples were then sequenced by following the

151 TruSeq RNA Exome protocol (see methods). Analysis of the RNASeq results was based on all  
152 C>U editing events in exons and UTRs that were (a) at least 5% in any sample, (b)  
153 overrepresented in the hypoxia group and (c) located in a putative RNA stem-loop structure [27]  
154 (see methods for details).

155

156 RNASeq analysis revealed 122 site-specific C>U editing events which were edited at a  
157 higher level in hypoxia as compared to normoxia, although editing also occurred in normoxia at  
158 variable levels due to cellular crowding in NK cells (Additional file 2; Table S1). The largest  
159 group of editing events comprised of non-synonymous changes, including 52 missense and 10  
160 stop gain changes (Fig. 2a). Synonymous C>U editing events occurred in RNAs of 42 genes  
161 (Additional file 1; Figure S1b). We verified RNA editing by Sanger sequencing of cDNAs in 10 of  
162 10 non-synonymously edited genes, which include *CHMP4B*, *EIF3I*, *FAM89B*, *GOLGA5*,  
163 *HSD17B10*, *RFX7*, *RPL10A*, *RPS2*, *TM7SF3* and *TUFM* (Fig. 2b). The highest level of non-  
164 synonymous RNA editing (~80%) occurred in *EIF3I*, which alters a highly conserved arginine to  
165 cysteine (c.C928T; R310C) (Fig. 2a and b). The average editing levels were lower for stop gain  
166 changes than for missense or synonymous changes and for changes in the UTRs and nc\_RNA  
167 exonic sites, suggesting functional constraints on editing events that introduce stop-gain  
168 changes (Fig. 2c).

169

170 We have previously identified the edited sites in RNAs of 293T/A3A and 293T/A3G  
171 overexpression systems [17, 28]. 37 of the 122 RNA editing sites in NK cells were among the  
172 712 sites (exons+UTRs) in the 293T/A3G system (Additional file 3; Table S2) whereas only 10  
173 edited sites in NK cells were among the 4,171 sites in the 293T/A3A system (Additional file 4;  
174 Table S3) ( $p=10^{-5}$ , Fisher's exact test) indicating that A3G is more likely to catalyze RNA editing  
175 in NK cells than A3A (Fig. 2d). Interestingly, 85 edited sites identified in NK cells did not overlap

176 with those in the 293T/A3G system. Different parameters used for the computational analysis of  
177 edited sites, cell type specific factors and the method of induction of RNA editing  
178 (overexpression versus hypoxia) may play a role in the differences observed in the RNA editing  
179 targets of A3G in primary cells versus its exogenous overexpression in 293T cells. A3G has a  
180 preference for CC nucleotides both in its ssDNA and RNA substrates, whereas other A3  
181 enzymes prefer TC nucleotides [13, 15, 17, 27, 28]. Sequence motif analysis of the 122 editing  
182 sites in NK cells shows a strong preference for C at -1 position (Fig. 2e), suggesting that these  
183 RNA editing events are catalyzed by A3G. The level of RNA editing and the expression of  
184 genes whose RNAs undergo editing show a weak positive correlation which is not statistically  
185 significant ( $r=0.1695$ ,  $p=0.0620$ ,  $n=122$  genes, Additional file 1; Figure S2), suggesting that  
186 expression levels of the RNA edited genes do not influence RNA editing levels.

187  
188 We determined the functional clustering of genes that undergo non-synonymous changes  
189 ( $n=62$ ) due to RNA editing in NK cells using DAVID Bioinformatics Resources. The highest  
190 enrichment was for genes involved in “translation initiation”, “translation” and “ribosome”  
191 (Additional file 1; Figure S3) due to missense changes in RNAs of 8 genes (Table 1), including  
192 the highest non-synonymously edited *EIF3I* (Fig. 2a). RNA editing targeted highly conserved  
193 amino acids in 7 of 8 genes as predicted by at least 2 of the 3 softwares (Table 1; see Additional  
194 file 5; Table S4 for conservation analysis of all non-synonymous RNA editing sites). RNA editing  
195 also altered a conserved C (phyloP100 score=1.7811) at -4 nucleotide position in the 5'-UTR of  
196 another gene encoding the ribosomal protein, *RPLP0* (Additional file 2; Table S1). Since the  
197 regulation of translation plays a central role during cell stress [29, 30], these results suggest that  
198 RNA editing coordinately alters multiple ribosomal and other translational proteins, and may  
199 have an impact on the quality or quantity of protein translation under hypoxic stress.

200



201 We also examined the changes in gene expression that occur during the induction of  
202 RNA editing in NK cells due to cellular crowding and hypoxia. We found upregulation of 82  
203 genes and downregulation of 237 genes (fold change>2 and padj<0.005, Additional file 6; Table  
204 S5 and Additional file 1; Figure S4). Multiple genes of the heat shock protein HSP70 family  
205 (*HSPA1B*, *HSPA1A*, *HSPA6*) [31] and *ATF3*, which encodes a transcription factor integral to the  
206 ER stress response [32] are among the most upregulated (Fig. 2f). Thus, cellular crowding and  
207 hypoxia triggers a coordinated transcriptome remodeling in NK cells, which includes  
208 transcriptional induction of stress genes as well as recoding C>U RNA editing of translational  
209 and ribosomal genes.

210

### 211 **Confirmation of APOBEC3G-mediated RNA editing in lymphoma cell lines**

212 To confirm A3G-mediated RNA editing and to examine the functional consequence of this  
213 editing in a cell line, we searched for cell lines that express A3G. We first examined the relative  
214 expression of A3G *in silico* in more than a 1,000 cell lines at the CCLE database. The highest  
215 expression of A3G was observed in leukemia and lymphoma cell lines (Additional file 1; Figure  
216 S5). Next, we ranked cell lines in the order of highest to lowest A3G expression (Fig. 3a) and  
217 selected JVM3 (rank=6), an EBV-transformed B cell polymphocytic leukemia cell line, and  
218 HuT78 (rank=8), a CD4+ cutaneous T cell lymphoma cell line, which has also previously been  
219 used to identify A3G as a restriction factor in vif deficient HIV-1 viruses [16].

220 As compared to primary CD4+ T cells, A3G is highly expressed in the HuT78 lymphoma  
221 cell line (Fig. 1b and Fig. 3a). To further validate the RNA editing function of A3G, we knocked-  
222 down A3G in these cells using an A3G-specific shRNA lentiviral construct and a scramble  
223 negative control shRNA (referred to as WT HuT78). The WT HuT78 cells and the A3G knock-  
224 down cell line (KD) were further propagated and cultured at a high density of  $1 \times 10^6$  cells in 100

225  $\mu$ l per well in a 96 well plate for 24 hours in normoxia or hypoxia (1% O<sub>2</sub>). High density culture  
226 and/or hypoxia treatment induced cell stress as there was an increased accumulation of  
227 phosphorylated eIF-2 $\alpha$  [26], 4 h post culture (Fig. 3b). Under these conditions, we measured the  
228 expression of A3G in these cell lines by qPCR (Fig. 3c). The KD HuT78 cells showed markedly  
229 reduced expression of A3G as compared with WT HuT78 (Fig. 3c). We did not observe any  
230 significant variation in A3G levels with or without hypoxia treatment in the WT and KD HuT78  
231 cells. A3F, which is also expressed in HuT78 did not show any significant variation in  
232 expression level between the WT and KD HuT78 cell lines, indicating that the knockdown for  
233 A3G is specific (Fig. 3c). We further confirmed the knock down of A3G by analyzing its protein  
234 expression by western blot (Fig. 3d) using specific antibodies to A3G. As compared to WT, KD  
235 HuT78 cells showed a reduction in A3G expression (Fig. 3d).

236 To determine the effect of A3G knock-down on RNA editing, we analyzed the editing level  
237 of three RNAs (*TM7SF3*, *EIF3I* and *RFX7*) previously validated as editing targets in NK cells.  
238 When cultured at a high density (mentioned above), we found site-specific editing of *TM7SF3*,  
239 *EIF3I* and *RFX7* RNAs in WT HuT78 cells and the level of editing was reduced in the A3G KD  
240 HuT78 cells (Fig. 3e and Additional file 1; Figure S6), correlating with the expression of A3G in  
241 these cells. We also confirmed the editing of *TM7SF3* in the JVM3 cell line in response to high  
242 cell density (Additional file 1; Figure S7a).

243 Considering that (1) A3G has a CC nucleotide preference, (2) RNA editing targets in NK  
244 cells and in 293T/A3G overexpression system overlap significantly (3) the same RNAs are site-  
245 specifically edited in NK and HuT78 cells-both highly expressing A3G; and (4) A3G KD HuT78  
246 cells show decreased RNA editing, these results collectively indicate that A3G is an  
247 endogenous, inducible mRNA editing enzyme in NK, CD8+ and HuT78 (and JVM3) cells.

248 **A3G induces RNA editing by mitochondrial respiratory inhibition, independently of HIF-**  
249 **1 $\alpha$**

250 To determine whether high density of HuT78 cells, which induces RNA editing by A3G,  
251 causes hypoxia, we cultured  $1 \times 10^6$  HuT78 cells in 100  $\mu$ l per well in 96 well plates (high density)  
252 and the same number of cells in 1 ml culture in 6 well plates (low density), each under normoxia  
253 and hypoxia. We analyzed the stabilization of the hypoxia-inducible factor-1 $\alpha$  (HIF-1 $\alpha$ ) protein,  
254 which is well known to be stabilized in hypoxic cells to promote the synthesis of mRNAs  
255 involved in cellular homeostasis [33], and measured the RNA editing levels of *TM7SF3*. As  
256 expected, HIF-1 $\alpha$  was not stabilized at T0- when the cells were at a non-stressed state or under  
257 low density normoxic cell culture (6 well) after 24 hours (Fig. 4a). However, we found the  
258 stabilization of HIF-1 $\alpha$  in cells cultured at a high density in 96 well plates both in normoxia and  
259 hypoxia, and in cells cultured at a low density in 6 well plates in hypoxia, suggesting that the  
260 high density 96 well normoxic culture had turned hypoxic (Fig. 4a). Under these conditions, RNA  
261 editing of *TM7SF3* was observed in cells cultured at a high cell density in both normoxia  
262 (20.6%) and hypoxia (20%) (Fig.4a; Additional file 1; Figure S7b). Although HIF-1 $\alpha$  stabilization  
263 was observed in low cell density (6 well) hypoxic cultures, no RNA editing was observed under  
264 these conditions (Fig. 4a). These results confirm that as in NK cells RNA editing is induced by  
265 high cell density and hypoxia in HuT78 cells. Moreover, the stabilization of HIF-1 $\alpha$  is not  
266 sufficient for the induction of RNA editing.

267 Previously we have shown that A3A-mediated RNA editing is induced by high cell density  
268 and hypoxia in hundreds of mRNAs in monocytes [15]. Furthermore, normoxic inhibition of the  
269 mitochondrial complex II by atpenin A5 (AtA5) and of the complex III by myxothiazol (MXT)  
270 mimic hypoxia and induce RNA editing as well as hypoxic gene expression in monocytes [34].  
271 Since A3G-mediated RNA editing in NK and HuT78 cells is also induced by hypoxia, we tested

272 the effect of these mitochondrial inhibitors on RNA editing in HuT78 cells cultured in normoxia.  
273 Additionally, to test whether endoplasmic reticulum (ER) stress can also induce RNA editing, we  
274 treated the cells with Thapsigargin (Tg). Tg induces ER stress by raising intracellular calcium  
275 levels and lowers the ER calcium levels by specifically inhibiting the endoplasmic reticulum  $\text{Ca}^{++}$   
276 ATPase [35, 36], resulting in the accumulation of unfolded proteins and an increased  
277 accumulation eIF-2 $\alpha$  phosphorylated at Ser 51 (Figs. 1c and 3b). To test the effect of hypoxic  
278 stress alone on HuT78 cells, we reduced the cell density to avoid cellular crowding and cultured  
279 the cells at an intermediate density of  $0.5 \times 10^6$  cells per 500  $\mu\text{l}$  per well in 24 well plates with or  
280 without the chemical inhibitors in normoxia, and hypoxia alone for one or two days. Under these  
281 conditions, we determined RNA editing level and the stabilization of HIF-1 $\alpha$  in these cells. We  
282 observed that RNA editing is mildly induced in cells treated with MXT and by hypoxia alone on  
283 day 1, at approximately 10% and 5% levels, respectively (Fig. 4b). RNA editing levels increased  
284 to approximately 30% in cells treated with MXT, AtA5 or hypoxia alone on day 2. Treatment of  
285 cells with Tg did not induce RNA editing (Fig. 4b). Furthermore, HIF-1 $\alpha$  was stabilized only  
286 when the cells were subjected to hypoxia but not in normoxia in the presence or absence of the  
287 mitochondrial inhibitors (Fig. 4c). These results suggest that RNA editing induced by hypoxic  
288 stress at a high cell density is triggered by mitochondrial respiratory inhibition and occurs  
289 independently of the stabilization of HIF-1 $\alpha$  as well as the ER stress response.

290 Although the A3G expression data did not include the NK-92 lymphoma cell line in the  
291 CCLE database, given its similar characteristics to primary NK cells and the convenience of  
292 culturing NK-92 cells as compared with primary NK cells, we tested the induction of RNA editing  
293 in NK-92 cells. We treated NK-92 cells with normoxia with or without the mitochondrial  
294 inhibitors (AtA5 or MXT) or hypoxia alone at intermediate density in 24 well plates for 2 days.  
295 Interestingly, RNA editing was induced by the inhibition of mitochondrial respiration (~25%), but  
296 only slightly by hypoxia treatment (Fig. 4d) in NK-92 cells. The reason behind the difference in

297 hypoxia induced RNA editing level of HuT78 and NK-92 cells may be due to metabolic  
298 differences between the two cell lines. However, the induction of A3G-mediated RNA editing  
299 due to mitochondrial respiratory stress in NK-92 cells provides a model system and an  
300 opportunity for further functional studies.

301 **APOBEC3G promotes Warburg-like metabolic remodeling and suppresses proliferation**  
302 **under stress**

303 We have previously identified *SDHB* and *SDHA* mitochondrial complex II subunits as  
304 targets of A3A-mediated RNA editing in hypoxic monocytes [15]. In the current study, we find  
305 that A3G non-synonymously edits several mitochondrial genes' RNAs including *TUFM*, *HADHA*,  
306 *HSD17B10* and *PHB2* in hypoxic NK cells (Fig. 2a). Thus we hypothesized that hypoxic stress-  
307 induced RNA editing by A3G alters mitochondrial function.

308  
309 To test the role of A3G on bioenergetics in response to high cell density and hypoxic  
310 stress, we measured the metabolic profile of WT and KD HuT78 cells using the Seahorse  
311 platform. We performed the mitochondrial and the glycolytic stress tests to measure the oxygen  
312 consumption rate, representative of basal respiration and the extracellular acidification rate,  
313 representative of glycolysis in cells cultured at a high density in three separate experiments (Fig.  
314 5a). We have presented metabolic alterations as respiration-to-glycolysis ratio (R/G) both in  
315 unstressed (T0) and stressed cells (Fig. 5b). As expected, cell stress caused by high cell  
316 density reduced R/G ratio in each experiment relative to unstressed T0 cells, indicating a  
317 decrease in respiration relative to glycolysis. However, R/G ratios decreased to a lesser extent  
318 under stress in A3G KD, relative to WT HuT78 cells, indicating that A3G plays a role in reducing  
319 mitochondrial respiration relative to glycolysis under hypoxic stress caused by high cell density  
320 (Fig. 5b).

321 Hypoxic stress can suppress translation and lead to growth arrest by inhibiting cell cycle  
322 progression in non-transformed cells or by promoting apoptosis by the p53 pathway in  
323 transformed cells [29, 37]. To examine the role of A3G on cellular proliferation under stress, we  
324 measured the proliferation of the WT and KD HuT78 cells when cultured at a high density for 22  
325 hours followed by 'recovery period' by culturing these stressed cells at a low density for another  
326 48 hours. The fraction of viable cells reduced in WT, but increased in A3G-KD HuT78 cells  
327 during 22 hours of stress (Fig. 5c) ( $\text{mean} \pm \text{SEM} = 0.653 \pm 0.197$  versus  $1.277 \pm 0.151$ ;  $n=3$ ),  
328 indicating that A3G-KD HuT78 cells proliferated more under high density culture conditions.  
329 However, the number of viable cells in WT and A3G-KD HuT78 cells did not show any  
330 difference at 48 hours after recovery from stress when cultured under non-stress conditions  
331 (Fig. 5c). These results suggest that hypoxic stress in lymphoma cells suppresses proliferation  
332 in vitro and that A3G plays an important role in this suppression.

### 333 **Discussion**

334 In this study we find that A3G edits scores of RNAs in NK cells and CD8+ T lymphocytes  
335 as well as lymphoma cell lines, when cultured at a high density and hypoxia. A3G-mediated  
336 site-specific RNA editing is triggered by the inhibition of mitochondrial respiration, and targets  
337 the mRNAs of many ribosomal and translational genes resulting in non-synonymous changes.  
338 A3G reduces mitochondrial respiration relative to glycolysis, and suppresses cell proliferation  
339 under stress in transformed lymphoma cells (Fig. 6). These results identify A3G cytidine  
340 deaminase as the third endogenous C>U RNA editing enzyme in mammals and together with  
341 A3A in myeloid cells, defines a new functional category of RNA editing enzymes that are active  
342 in immune cells. In addition, our findings uncover a previously unrecognized gene regulation  
343 mechanism in NK and CD8+ T cells that is induced by hypoxic stress.

344           There are two major differences in A3-mediated RNA editing and ADAR- and APOBEC1-  
345 mediated editing. First, A3-mediated RNA editing is induced upon hypoxic stress (A3A and  
346 A3G) or by IFNs (A3A), while it is essentially absent or rare in baseline unstressed immune cells  
347 [15] (Fig. 1d). In contrast, ADAR and APOBEC1-mediated RNA editing events occur in baseline  
348 unstimulated cells [38-40]. Second, A3-mediated RNA editing events occur in exonic coding  
349 regions of genes as commonly as in UTRs [15] (Fig. 2c), whereas ADAR- and APOBEC1-  
350 mediated RNA editing events preferentially occur in UTRs, where they are at least an order of  
351 magnitude more frequent relative to coding exons [38-40]. Together, these findings suggest that  
352 A3-mediated RNA editing plays a role in response to certain cell stress by altering protein  
353 function.

354           A recurrent theme in many types of cell stress responses, including ER and mitochondrial  
355 unfolded protein stress response generally caused by heat shock, nutrient deprivation, hypoxia  
356 or DNA damage, is the regulation of gene expression. This is achieved by the general  
357 suppression or reprogramming of translation to promote recovery from stress or cell death [30,  
358 41]. The highest level of RNA editing resulting in a non-synonymous change is observed in  
359 *EIF3I* in hypoxic NK cells. *EIF3I* encodes a subunit of EIF3, the most complex translation  
360 initiation factor comprised of 13 subunits in mammals, which is involved in all molecular aspects  
361 of translation initiation. The EIF3 complex has been implicated in the translation of mRNAs  
362 important for cell growth [42] and mitochondrial respiration [43], and its subunits are  
363 overexpressed in multiple cancers [44]. Interestingly, EIF3I was previously shown to have  
364 decreased protein synthesis in cold-stressed mammalian cells, implying its important role in  
365 stress response and recovery [45]. Consistent with these reports, we find that the knockdown of  
366 A3G in HuT78 lymphoma cells reduces the predicted deleterious RNA editing of *EIF3I* in  
367 association with reduced mitochondrial respiration and cell proliferation (Additional file 5; Table  
368 S4) during hypoxic stress. Thus, our findings suggest that A3G promotes hypoxic stress

369 responses via RNA editing of *EIF3I*, ribosomal/translational genes and possibly other stress-  
370 related genes.

371 Cancer cells switch to aerobic glycolysis even in the presence of a functional  
372 mitochondria and this phenomenon is termed the 'Warburg effect'. However, the function of  
373 Warburg effect in tumor growth, proliferation and support of cellular biosynthetic programs is still  
374 inconclusive [46]. In response to acute hypoxia, A3G-mediated RNA editing in the WT cells may  
375 promote Warburg effect by preferring glycolysis over mitochondrial respiration and decreased  
376 translation, while limiting overall cellular proliferation.

377 Interestingly, even though normal B cells and plasma cells show low expression of A3G  
378 (Fig 1a), we find that the highest expression levels are observed in neoplastic B and plasma cell  
379 lines derived from acute lymphoblastic leukemia, B-cell lymphoma, Burkitt lymphoma and  
380 multiple myeloma. Increased expression of A3G in many B-cell leukemia/lymphoma cell lines  
381 (Fig. 3a), and NK/T cell lymphoma [47] supports the notion that it may play an oncogenic role by  
382 enhancing survival under oxygen-limiting conditions. It is known that NK cell function is impaired  
383 in the tumor micro-environment or chronic infections due to multiple factors, including hypoxia  
384 [48]. This may be achieved in part by A3G-mediated RNA editing resulting in the cellular  
385 remodeling during stress.

386 We also find that RNA editing by A3G can be induced by normoxic inhibition of  
387 mitochondrial respiration and occurs independently of HIF-1 $\alpha$  stabilization (Fig. 4), in a manner  
388 similar to the regulation of A3A-mediated RNA editing in monocytes [34]. Earlier studies have  
389 shown that the inhibition of mitochondrial respiration antagonizes the stabilization of HIF-1 $\alpha$  in  
390 hypoxia [49]. Despite the lack of HIF-1 $\alpha$  stabilization, however, we find that mitochondrial  
391 respiratory inhibition mimics hypoxia and induces RNA editing by A3G. Thus, A3G-mediated  
392 RNA editing joins a growing number of hypoxia-induced responses that can be mimicked by the



393 inhibition of mitochondrial respiration. These include carotid body paragangliomas caused by  
394 mitochondrial complex II mutations [50], expression of hypoxia-related genes and A3A-  
395 mediated RNA editing responses in monocytes [34], stimulation of the cardiorespiratory system  
396 by carotid body chemoreceptors [51], hypoxic pulmonary vasoconstriction mediated by  
397 pulmonary arterial smooth muscle cells [52], and hypoxia-induced changes in astrocytes [53],  
398 the most abundant glial cells in the brain. We hypothesize that hypoxia triggers A3G-mediated  
399 RNA editing downstream of a pathway activated by mitochondrial respiratory inhibition as a  
400 result of severe oxygen deprivation or respiratory inhibitors in normoxia (Fig. 6). Details of this  
401 mitochondrial hypoxic signaling pathway that activates A3-mediated RNA editing are subject of  
402 future studies.

403 Finally, the unexpected discovery of RNA editing functions for A3A and A3G require  
404 reconsideration of the physiological functions of the A3 enzymes solely as anti-viral factors. For  
405 example, A3G evolved with positive selection signature for millions of years in the primate  
406 lineage before humans were infected by HIV-1 [54]. Also, A3G orthologs that have the signature  
407 of positive evolutionary selection are present in primates that are not infected by SIVs [55].  
408 Although suppression of endogenous retroviruses was speculated as an *in vivo* function of A3  
409 enzymes, mouse A3 knockout is viable without any evidence of catastrophic retroviral infection  
410 [56]. Furthermore, the anti-HIV model of the double-domain A3G does not adequately explain  
411 why the zinc-coordinating residues in the N-terminal domain are conserved, since ssDNA  
412 deamination of HIV-1 minus strand by A3G in target cells does not require catalytic activity of  
413 the N-terminal domain [13, 14]. In contrast, RNA editing requires the conserved zinc-  
414 coordinating residues in both its N-and C-terminal domains [17]. Thus, cellular RNA editing  
415 provides a plausible explanation for A3G's long-term evolutionary history, the presence of two  
416 conserved zinc-coordinating catalytic domains and the high expression patterns in NK and  
417 CD8+ T cells. In conclusion, our findings suggest that the primary function of A3G *in vivo* may

418 be cellular RNA editing to facilitate adaptation to mitochondrial hypoxic stress in lymphocytes.  
419 Further studies are required to examine the RNA editing function of the other APOBEC3  
420 enzymes, as well as their significance in immunity.

## 421 **Conclusion**

422 This study shows the endogenous inducible site-specific RNA editing activity of the A3G cytidine  
423 deaminase, the most studied member of the APOBEC3 family, and suggests its physiological  
424 function in human immune and transformed cells. Widespread RNA editing by A3G can facilitate  
425 cellular adaptation to hypoxic cell stress triggered by mitochondrial respiratory inhibition in  
426 primary cytotoxic lymphocytes and lymphoma cell lines. A3G is the third endogenous C>U RNA  
427 editing enzyme to be identified in mammals. In addition, our study uncovers a novel  
428 epitranscriptomic gene regulation mechanism in cytotoxic lymphocytes, specifically NK cells.  
429 APOBEC3 cytidine deaminases may define a new class of RNA editing enzymes that are  
430 induced in response to certain cell stress factors.

431

## 432 **Methods:**

### 433 **RNA Sequencing**

434

435 RNAs (DNA-free) were extracted from NK cells of 3 donors subjected to normoxia and hypoxia  
436 treatments (6 samples total) using the Total RNA clean-up and concentration kit (Norgen Biotek)  
437 as per the manufacturer's instructions. RNA Libraries were prepared using the Illumina TruSeq  
438 RNA Exome protocol and kit reagents. RNA input for intact total RNA was 10 ng. RNA QC  
439 analysis by electrophoresis (2100 Expert, B.02.08.SI648, Agilent Technologies, Inc.) showed  
440 RIN numbers of 9.6, 7.8, 6.4 for normoxic and 2.8, 9.4 and 2 for hypoxic samples. These RIN  
441 numbers showed evidence of RNA degradation. Therefore, for degraded RNA samples input

442 amount was determined by calculating the percentage of RNA fragments >200 nt (DV200) by  
443 running the samples on an RNA ScreenTape (Agilent Technologies) and performing region  
444 analysis using the TapeStation Analysis Software. Based on the DV200 calculation of 52-85%,  
445 40 ng was the input amount and was considered suitable for this protocol. Fragmentation of the  
446 RNA was performed on intact samples. First and second strand synthesis were performed to  
447 generate double-stranded cDNA. The 3' ends were adenylated and Illumina adapters were  
448 ligated using T-A ligation. PCR was performed to generate enough material for hybridization  
449 and capture. PCR products were validated for the correct sizing using D1000 Screentape  
450 (Agilent Technologies). 200 ng of each product was pooled together in 4-plex reactions for  
451 hybridization and capture. Two sequential rounds of hybridization and capture were performed  
452 using the desired Capture Oligo pool. A second round of PCR was done to generate sufficient  
453 libraries for sequencing. Final libraries were validated for correct size distribution on a D1000  
454 Screentape, quantified using KAPA Biosystems qPCR kit, and the 4-plex capture pools were  
455 pooled together in an equimolar fashion, following experimental design criteria.  
456 Each pool was denatured and diluted to 2.4 pM with 1% PhiX control library added. Each pool  
457 was denatured and diluted to 16 pM for On-Board Cluster Generation and sequencing on a  
458 HiSeq2500 sequencer using 100 cycle paired-end cluster kit and rapid mode SBS reagents  
459 following the manufacturer's recommended protocol (Illumina Inc.) and 100 million paired reads  
460 per sample were obtained.

461

#### 462 **RNA editing bioinformatics analysis**

463 *RNA editing events detection:* Sequence reads passing quality filter from Illumina RTA were  
464 first checked using FastQC [57] and then mapped to GENCODE  
465 (<https://www.genencodegenes.org/>) annotation database (V25) and human reference genome  
466 (GRCh38.p7) using Tophat2 [58] with a lenient alignment strategy allowing at most 2

467 mismatches per read to accommodate potential editing events . The mapped bam files were  
468 further QCed using RSeqQC [59]. Then all samples were run through the GATK best practices  
469 pipeline of SNV calling ([https://gatkforums.broadinstitute.org/gatk/discussion/3892/the-gatk-](https://gatkforums.broadinstitute.org/gatk/discussion/3892/the-gatk-best-practices-for-variant-calling-on-rnaseq-in-full-detail)  
470 [best-practices-for-variant-calling-on-rnaseq-in-full-detail](https://gatkforums.broadinstitute.org/gatk/discussion/3892/the-gatk-best-practices-for-variant-calling-on-rnaseq-in-full-detail)) using RNASeq data to obtain a list of  
471 candidate variant sites. All known SNPs from dbSNP ( V144) [60] were removed from further  
472 analyses.

473 *Hypoxia induced editing events filtering:* Pileups at candidate sites were generated using  
474 samtools for all samples and the base counts for alternative and reference base were  
475 calculated. Potential candidates for RNA editing were first filtered using the following two  
476 criteria: (a) at least 5% editing level on any sample within the population; (b) only C>T and G >A  
477 events were selected. The editing base counts were modeled as Binomial distribution and the  
478 effect of hypoxia on RNA editing at each site was tested with a generalized linear model (GLM)  
479 using paired samples. Multiple test adjustment was applied using Benjamini-Hochberg  
480 procedure to control false discovery rate (FDR). Hypoxia induced editing events were identified  
481 with log-odds-ratio greater than 0 and adjusted-p value less than 0.05.

482 *Results:* A table specifying the editing site, the type of editing event, editing level and number of  
483 reads on a reference and alternative bases on each sample for each group was initially  
484 produced filtering events with OR > 1 and a FDR < 0.05 level.

485 *Annotation:* Hypoxia induced editing events passing filters were annotated using ANNOVAR  
486 [61] with RefSeq gene annotation database to identify gene features, protein changes and  
487 potential impact. Also 15 base pair upstream and downstream flanks from the variant sites were  
488 displayed in separate columns.

489 *Manual filter:* The above analyses initially revealed 383 C>U editing sites which were then  
490 subjected to a final stringent manual filtering step which retained only those sites (a) in exons  
491 and UTRs, (b) with -1 position (relative to edited C) is either a C or T and (c) within a stem-loop

492 structure where the edited C is at the 3'-end of a putative tri- or tetra loop which is flanked by a  
493 stem that was at least 2 base pair long when base complementarity was perfect, or at least 4  
494 base pair long when complementarity was imperfect by 1 nucleotide mismatch or 1 nucleotide  
495 bulging. This stringent manual filter reduced the number of edited sites to 122 (Additional file 2;  
496 Table S1).

497

#### 498 **RNASeq differential expression analysis**

499 Raw counts for each gene were generated using HTSeq [62] with intersection\_strict mode.  
500 Differential gene expression was analyzed by DESeq2 [63]. Bioconductor package with paired  
501 sample design to identify hypoxia induced gene expression changes.

502

#### 503 **Conservation analysis of amino acids recoded by RNA editing in NK cells**

504 The impact of non-synonymous RNA editing on protein function was examined by PolyPhen  
505 and SIFT programs from ENSEMBL VEP tool, which give a score and a verbal description of  
506 the impact (<https://useast.ensembl.org/info/docs/tools/vep/index.html>). In addition, conservation  
507 score based on 100 vertebrates basewise conservation was obtained from UCSC  
508 (phyloP100way).

509

#### 510 **Isolation and culture of cells**

511 The HuT78, JVM3 and NK-92 cell-lines were obtained from ATCC. Hut 78 cells were cultured in  
512 IMDM (ATCC) containing 20% Fetal Bovine serum (FBS) (Sigma-Aldrich), JVM3 cells were  
513 cultured in RPMI (ATCC) containing 10% FBS and NK-92 cells were cultured in Alpha Minimum  
514 Essential medium without ribonucleosides and deoxyribonucleosides (Life Technologies) but  
515 with 2 mM L-glutamine and 1.5 g/L sodium bicarbonate as well as 0.2 mM inositol, 0.1 mM 2-  
516 mercaptoethanol, 0.02 mM folic acid, 500 U/ml IL-2 (Aldesleukin - a kind gift from Novartis),

517 12.5% horse serum (ATCC) and 12.5% FBS. Peripheral blood mononuclear cells (PBMCs) of  
518 anonymous platelet donors were isolated from peripheral blood in Trima Accel™ leukoreduction  
519 system chambers (Terumo BCT) in accordance with an institutional review board-approved  
520 protocol, as described earlier [15], in RPMI-1640 medium (Mediatech) with 10% FBS, 100 U/ml  
521 penicillin and 100 µg/ml streptomycin (Mediatech). NK, CD4+ and CD8+ cells were isolated  
522 from PBMCs (cultured at  $5 \times 10^7$  in 1.8 ml per well in 12 well plates) by immunomagnetic negative  
523 selection using the EasySep™ Human NK Cell Isolation Kit (Stemcell Technologies, catalog #  
524 17955), EasySep™ Human CD4+ Cell Isolation Kit (Stemcell Technologies, catalog # 17952)  
525 and EasySep™ Human CD8+ Cell Isolation Kit (Stemcell Technologies, catalog # 17953),  
526 respectively, following the manufacturer's instructions. Enrichment for NK cells was > 90%  
527 (Additional file 1; Figure S8) and that of CD4+ and CD8+ was >99%, as verified by flow  
528 cytometry.

529

### 530 **Cell stress and inhibitor treatment**

531 For cell crowding experiments, the HuT78 cells were cultured at a density of  $0.5-1 \times 10^6$  cells per  
532 100 µl per well in 96 well plates for 22-24 hours at 37° C.

533 For hypoxia treatment, PBMCs were cultured at a density of  $5 \times 10^7$  in 1.8 ml per well in 12 well  
534 plates under 1% O<sub>2</sub>, 5% CO<sub>2</sub> and 94% N<sub>2</sub> in an Xvivo™ System (Biospherix) for 40 hours.

535 Following culture, NK, CD4+ and CD8+ cells were separated as mentioned above. In case of  
536 HuT78, the cells were cultured in the hypoxia chamber for 24 or 40 hours at a density of  $1 \times 10^6$   
537 cells per ml in 6 well plates.

538 For testing the mitochondrial inhibitors, HuT78 and NK-92 cells were cultured at  $0.5 \times 10^6$  cells  
539 per 0.5 ml in 24 well plates in normoxia with or without AtA5 and MXT or hypoxia alone for 2  
540 days at 37 °C.

541 Human IFN- $\gamma$  was obtained from PeproTech and used at a concentration of 50 ng/ml. AtA5  
542 (Cayman chemical #11898) and MXT (Sigma Aldrich #T5580) was used at a concentration of 1  
543  $\mu$ M.

544

#### 545 **Extracellular Flux Assays**

546 HuT78 cells (scramble WT and KD) were plated in 96-well plates at a density of 0.5 or  $1 \times 10^6$  in  
547 100  $\mu$ l per well (total  $3 \times 10^6$  cells) and incubated for 22-24 hours at 37° C. The cells were  
548 harvested and washed with PBS and re-counted on a hemocytometer (INCYTO C-Chip). Half of  
549 the cells were re-suspended in the XF base media specific for the Mitochondrial and the other  
550 half in XF base media specific for the Glycolytic Stress Tests (below), respectively. For all  
551 extracellular flux assays, cells were plated on cell-tak coated Seahorse XF96 cell culture  
552 microplates in (duplicate, triplicate or quadruplicate, depending on the cell count post culture) at  
553 a density of  $3-6 \times 10^5$  cells per well. The assay plates were spin seeded for 5 minutes at 1,000  
554 rpm and incubated at 37°C without CO<sub>2</sub> prior to performing the assay on the Seahorse  
555 Bioscience XFe96 (Agilent). The Mitochondrial Stress Test was performed in XF Base Media  
556 containing 10 mM glucose, 1 mM sodium pyruvate, and 2 mM L-glutamine and the following  
557 inhibitors were added at the final concentrations: Oligomycin (2  $\mu$ M), Carbonyl cyanide 4-  
558 (trifluoromethoxy)phenylhydrazone (FCCP) (2  $\mu$ M), Rotenone/Antimycin A (0.5  $\mu$ M each). The  
559 Glycolytic Stress Test was performed in XF Base Media containing 2 mM L-glutamine and the  
560 following reagents were added at the final concentrations: Glucose (10 mM), Oligomycin (2  $\mu$ M),  
561 and 2-deoxy-glycose (50 mM).

#### 562 **shRNA-mediated Knock-down of *APOBEC3G* in HuT78 cells**

563 A3G knock-down in Hut78 cells was performed at the RPCCC gene modulation shared  
564 resource. For A3G knock-down, GIPZ human A3G shRNAs with the following Clone ID's were

565 used: V2LHS\_80856, V2LHS\_80785, V2LHS\_80786 (Dharmacon). Lentiviruses were produced  
566 by cotransfection of 293T cells with A3G shRNA (or pGIPZ non-silencing control) along with  
567 psPAX2 and pMD2.G packaging plasmids, using the LipoD293 reagent (1:2.5 DNA to lipoD293  
568 ratio) (SignaGen Laboratories) as per the manufacturer's instructions. Culture supernatants  
569 were collected 48 and 72 hours after transfection and cleared by filtration through 0.45  $\mu$ m  
570 cellulose acetate syringe filter. For shRNA expression,  $1 \times 10^6$  Hut78 cells were pelleted and re-  
571 suspended with 1 ml culture supernatants containing the virus and 1  $\mu$ l of 4 mg/ml polybrene.  
572 The cells were placed in 6 well plates and incubated for 30 mins at 37° C. The plate was sealed  
573 and spun at 1800 rpm for 45 mins in a microtiter rotor (Beckman Coulter) at room temperature  
574 and then incubated for 6 hours at 37 °C. After infection the cells were centrifuged at 500g for 5  
575 mins and resuspended in IMDM media and incubated for 48 hours at 37° C. Puromycin (1  
576  $\mu$ g/ml) was added to the media to select for GFP positive cells. Clone ID V2LHS\_80856 cells did  
577 not proliferate. Clone IDs V2LHS\_80785 and V2LHS\_80786 HuT78 cells were further sorted by  
578 the BD FACSAria II cell sorter (BD Biosciences) to obtain >95% pure GFP positive cells. A3G  
579 knock-down was verified by measuring the expression of A3G by qPCR. While Clone ID  
580 V2LHS\_80785 did not show any difference in A3G gene expression in the WT and KD cells,  
581 clone ID V2LHS\_80786 showed a significant reduction in A3G expression and was henceforth  
582 used for our studies (KD HuT78 cells) (Fig. 3c).

583

#### 584 **RT-PCR and Sanger Sequencing**

585 Total RNA was isolated and reverse transcribed to generate cDNAs as described earlier [15].  
586 DNA primers used for PCR were obtained from Integrated DNA Technologies and are noted in  
587 Additional file 7; Table S6. Primers used for PCR of cDNA templates were designed such that  
588 the amplicons spanned multiple exons. Agarose gel electrophoresis of PCR products was  
589 performed to confirm the generation of a single product in a PCR and then sequenced on the



590 3130 xL Genetic Analyzer (Life Technologies) at the RPCCC genomic core facility as described  
591 previously [17]. To quantify RNA editing level, the major and minor chromatogram peak heights  
592 at putative edited nucleotides were quantified with Sequencher 5.0/5.1 software (Gene Codes,  
593 MI). Since the software identifies a minor peak only if its height is at least 5% that of the major  
594 peak's, we have considered  $0.048 [=5/(100+ 5)]$  as the detection threshold [17, 27].

595 For quantitative PCR to assess *APOBEC3G* and *APOBEC3F* gene expression, reactions using  
596 LightCycler™ 480 Probes Master and SYBR™ Green I dye were performed on a LightCycler™  
597 480 System (Roche). Quantification cycle ( $C_q$ ) values were calculated by the instrument  
598 software using the maximum second derivative method, and the mean  $C_q$  value of duplicate  
599 PCR reactions was used for analysis.

600

#### 601 **Immunoblotting assays of cell lysates**

602 Whole cell lysates were prepared and immunoblot was performed as described previously [15,  
603 34]. APOBEC3G antiserum (Apo C17, catalog number- 10082) was obtained from the NIH AIDS  
604 Reagent program [64, 65], Rabbit monoclonal Phospho-eIF-2 $\alpha$  (Ser51) (product number-3398,  
605 DG98) was obtained from Cell Signaling Technology, mouse monoclonal anti- $\beta$ -actin (product  
606 number AM4302, AC-15) was obtained from Life Technologies, mouse monoclonal anti-HIF1 $\alpha$   
607 (product number GTX628480, GT10211) and rabbit polyclonal anti- $\alpha$ -Tubulin (product number  
608 GTX110432) was obtained from GeneTex and used at dilutions recommended by their  
609 manufacturers in 5% milk, except Phospho-eIF-2 $\alpha$ , which was diluted in 5% BSA. HRP-  
610 conjugated goat anti-mouse or anti-rabbit antibodies were purchased from Life Technologies  
611 and used at 1:2000 dilution followed by chemiluminescent detection of the proteins [15].

#### 612 **Cell proliferation assay**

613 WT and KD HuT78 cells ( $1 \times 10^6$  cells in 100  $\mu$ l per well) were seeded in 96-well round-bottom  
614 plates and incubated covered in the culture medium for 22 hours in a 37°C humidified hypoxia

615 chamber (1% O<sub>2</sub>) or 37°C humidified culture chamber (21% O<sub>2</sub>). Cell viability was determined  
616 using a WST-8 viability stain based colorimetric assay (Dojindo Molecular Technologies, Inc.).  
617 Plates were read at 450nm on an Epoch2 microplate reader (Biotek) using the Gen5 software  
618 (Biotek).

619

## 620 **Statistical Analysis**

621 Statistical analysis was performed using GraphPad Prism (7.03). A3G expression levels and  
622 mean editing levels in different cell types (Fig. 1) were first determined to be significantly  
623 statistically different by 1-way ANOVA followed by the recommended multiple comparison tests.  
624 RNA editing level and cell proliferation differences between WT and KD Hut78 cells for each  
625 gene (Fig. 3e and Fig. 5c) were examined by multiple t tests using the Holm-Sidak method, with  
626 alpha=0.05. The effect of inhibitors on RNA editing was first determined to be statistically  
627 significant by 2-way (Fig. 4b) or 1-way (Fig. 4d) ANOVA followed by, multiple comparisons of  
628 the treatment means for day 1 and/or day 2 using the recommended Dunnett's multiple  
629 comparisons test. Respiration to glycolysis ratios (R/G) were calculated using basal respiration  
630 value for each well divided by the average glycolysis value of all wells for each experimental  
631 group (n=3 for WT and KD HuT78 cells). These ratios were then normalized to the  
632 corresponding WT and KD T0 (unstressed cells) ratios within each experimental group, which  
633 are set to 1 (Fig. 5b). The comparison of WT and KD HuT78 cells R/G ratios under stress,  
634 across all experiments were performed by Mann-Whitney non-parametric test after normalizing  
635 the R/G values against the average of WT stress ratio in experiment 1. P values are indicated  
636 by stars: \* = p < 0.05, \*\* = p < 0.01, \*\*\* = p < 0.001, \*\*\*\* = p < 0.0001.

637

638

639

640 **Others**

641 Gene expression analysis of A3G is performed on two online platforms: (1) BIOGPS at  
 642 <http://biogps.org/#goto=welcome>, a collection of thousands of gene expression datasets and (2)  
 643 Cancer Cell Line Encyclopedia (CCLE) portal at <https://portals.broadinstitute.org/ccle>. CCLE  
 644 database contains 1457 cell lines. Weblogo is created at <http://weblogo.berkeley.edu/> (2/19/18)  
 645 with default parameters[66].

646

647 **Table 1**

648 **Conservation of amino acids recoded by A3G-mediated RNA editing in translational and**  
 649 **ribosomal genes**

| <b>Mutation</b>    | <b>Gene</b> | <b>AACchange</b>                     | <b>PolyPhen</b>              | <b>SIFT</b>           | <b>Phyl<br/>oP</b> |
|--------------------|-------------|--------------------------------------|------------------------------|-----------------------|--------------------|
| 1:322311<br>46-CT  | EIF3I       | NM_003757:exon11:c.C928T:<br>p.R310C | Possibly<br>damaging(0.901)  | deleterious(<br>0)    | 2.644<br>53        |
| 15:55196<br>824-GA | RSL24<br>D1 | NM_016304:exon1:c.C67T:p.R<br>23C    | benign(0.011)                | deleterious(<br>0.02) | 3.433<br>96        |
| 6:354702<br>71-CT  | RPL10<br>A  | NM_007104:exon5:c.C403T:p.<br>P135S  | possibly_damagin<br>g(0.866) | deleterious(<br>0.01) | 7.649<br>55        |
| 19:17863<br>201-CT | RPL18<br>A  | NM_000980:exon5:c.C469T:p.<br>R157W  | benign(0.12)                 | deleterious(<br>0.03) | 3.411<br>86        |
| 17:28720<br>820-CT | RPL23<br>A  | NM_000984:exon2:c.C139T:p.<br>R47W   | benign(0.013)                | tolerated(0.<br>28)   | 1.927<br>39        |
| 19:39433<br>341-GA | RPS1<br>6   | NM_001020:exon5:c.C373T:p.<br>R125C  | possibly_damagin<br>g(0.901) | deleterious(<br>0.03) | 7.596<br>89        |

|                   |            |                                          |                              |                       |            |
|-------------------|------------|------------------------------------------|------------------------------|-----------------------|------------|
| 16:19626<br>10-GA | RPS2       | NM_002952:exon6:c.C596T:p.<br>P199L      | possibly_damagin<br>g(0.905) | deleterious(<br>0.03) | 9.862      |
| 1:395617<br>54-GA | PABP<br>C4 | NM_001135653:exon15:c.C19<br>27T:p.H643Y | benign(0.063)                | deleterious(<br>0.02) | 10.00<br>3 |

650

651

## 652 **Figure Legends**

653

### 654 **Fig. 1 Cell specific expression of APOBEC3G (A3G) and the induction of RNA editing in**

#### 655 **NK cells**

656 **(a)** Cell type specific expression of A3G (probe:214995\_s\_at) in Primary Cell Atlas, a meta-

657 analysis of publicly available 100+ microarray datasets, available through the BIOGPS portal.

658 **(b)** A3G gene expression in NK, CD4+ T and CD8+ T cells. Gene expression measurements

659 are normalized to that of  $\beta$ 2-Microglobulin **(c)** Immunoblot showing the protein levels of eIF-2 $\alpha$

660 phosphorylated at Ser 51 in whole cell lysates of NK cells at 0, 20 and 40 h under normoxia (N)

661 or hypoxia (H). Thapsigargin (Tg) treated NK cells are used as a positive control and  $\beta$ -actin is

662 used as a loading control **(d)** Sanger sequence chromatogram traces of cDNAs of PCR

663 products of *TM7SF3* of unstressed (baseline, T0), normoxic (N) or hypoxic (H) NK cells. Edited

664 C in *TM7SF3* is highlighted black **(e)** Estimation of site-specific C>U RNA editing by Sanger

665 sequencing of RT-PCR products for *TM7SF3*, *RPL10A* and *RFX7* of NK, CD4+ T and CD8+ T

666 cells subjected to hypoxia. See Methods for statistical analysis.

667

### 668 **Fig. 2 Distribution of site-specific A3G-mediated mRNA editing in NK cells**

669 **(a)** A3G-mediated C>U RNA editing in NK cells resulting in non-synonymous changes (n=62)

670 based in the order of highest to lowest editing level in hypoxia (40 h). Black symbols indicate

671 genes that acquire nonsense RNA editing (n=10). **(b)** Sanger sequence chromatogram traces of  
672 amplified cDNA fragments comparing site-specific C>U editing in mRNAs of ten genes under  
673 normoxia and hypoxia. **(c)** Graph representing the editing levels of mRNA substrates of A3G in  
674 hypoxic NK cells and the location of editing in the mRNA as well as the type of change in the  
675 transcript sequence due to this editing **(d)** Venn diagram showing the number of unique and  
676 overlapping RNA editing sites (exonic and UTR) among hypoxic NK cells, 293T/A3A and  
677 293T/A3G overexpression systems. **(e)** Logo indicating sequence conservation and nucleotide  
678 frequency for sequences bearing C>U editing sites (at position 0) among the edited transcripts  
679 in NK cells (n=122) **(f)** Heat map representing the most upregulated genes (n=50) in NK cells  
680 subjected to cellular crowding and hypoxia (cell stress)

681

682 **Fig. 3 Distribution and induction of A3G-mediated C>U mRNA editing in lymphoma cell**  
683 **lines (a)** A List of cell lines in the CCLE database that have the highest expression of A3G  
684 (Affymetrix). The highlighted cell lines JVM3 and HuT78 are used in this study. **(b)** Immunoblot  
685 showing the protein levels of eIF-2 $\alpha$  phosphorylated at Ser 51 in whole cell lysates of scramble  
686 WT and KD HuT78 cells at various time points. Thapsigargin (Tg) treated HuT78 cells is a  
687 positive control and  $\alpha$ -Tubulin is used as a loading control. The WT and the KD HuT78 cells  
688 samples were run on two separate gels on the same day. The dashed line separates the two  
689 gels **(c)** A3G and A3F gene expression in control WT and KD HuT78 cells under normoxia (N)  
690 and hypoxia (H). Gene expression measurements are normalized to that of  $\beta$ 2-Microglobulin **(d)**  
691 Immunoblot for A3G protein expression in whole cells lysates of WT and KD HuT78 cells.  $\alpha$ -  
692 Tubulin is used as a loading control **(e)** Graph representing the percentage site-specific C>U  
693 RNA editing level for *TM7SF3*, *EIF3I* and *RFX7* of scramble WT and KD HuT78 cells in  
694 normoxia. See Methods for statistical analysis.

695

696 **Fig. 4 Induction of A3G-mediated C>U mRNA editing by the inhibition of mitochondrial**  
697 **respiration (a)** Immunoblot showing the protein level of HIF-1 $\alpha$  in whole cell lysates of HuT78  
698 when subjected to normoxia (N) and hypoxia (H) in 96 well (W) and 6 W plates for 24 hours. All  
699 lanes are part of the same gel. The dashed line represents the cropped region. The percentage  
700 C>U RNA editing levels in *TM7SF3* under these conditions is displayed below **(b)** The  
701 percentage C>U RNA editing in *TM7SF3* when HuT78 cells are treated with Myxothiazol (MXT),  
702 Thapsigargin (Tg), Atpenin (AtA5) and Hypoxia (H) for 24 hours (Day 1) or 42 hours (Day 2)  
703 (n=3) **(c)** Immunoblot showing the protein level of HIF-1 $\alpha$  in whole cell lysates of HuT78 when  
704 subjected to normoxia (N) with or without the mitochondrial inhibitors (MXT and AtA5) and  
705 hypoxia (H) for one or two days **(d)** The percentage C>U RNA editing in *TM7SF3* when NK-92  
706 cells are treated with Myxothiazol (MXT), Atpenin (AtA5) and Hypoxia (H) for 42 hours (n=3).  
707 See Methods for statistical analysis.

708  
709 **Fig. 5 A3G-mediated C>U mRNA editing results in Warburg-like effect in lymphoma cell**  
710 **lines (a)** Plot representing the basal respiration versus glycolysis in T0 unstressed and stressed  
711 cells (cellular crowding in normoxia) in WT and KD HuT78 cells (mean and SD, n=3-4). **(b)** Bar  
712 graph showing the respiration to glycolysis ratios (R/G) normalized to unstressed WT and KD  
713 HuT78 cells are shown (mean and SEM). **(c)** Bar graph representing the fraction of viable WT  
714 and KD HuT78 cells when subjected to cellular crowding for 24 hours in normoxia (see  
715 methods) followed by culture in non-stressed conditions for another 48 hours (Mean and SEM,  
716 n=3). See Methods for statistical analysis.

717  
718 **Fig. 6 Simplified diagram summarizing the induction and relevance of A3G-mediated site-**  
719 **specific C>U cellular mRNA editing in NK cells and lymphoma cell lines.** NK / lymphoma  
720 cell is shown under normal physiological conditions when the cells are unstressed (left) or when

721 the cells are stressed by hypoxia (top right) or due to the inhibition of mitochondrial respiration  
722 (bottom right). Under normal physiological conditions (baseline) mRNAs (stem-loop) in NK cells  
723 do not undergo C>U RNA editing. Under hypoxic stress or upon mitochondrial respiratory  
724 inhibition, an unknown signal originating in the mitochondria (red) triggers site-specific A3G-  
725 mediated C>U editing in multiple mRNA substrates bearing a stem-loop structure. The cellular  
726 mRNA editing induced by mitochondrial hypoxic stress may result in translational  
727 reprogramming of NK cells, Warburg-like metabolic remodeling by preferring glycolysis over  
728 mitochondrial respiration, and reduced cellular proliferation in order to promote adaption during  
729 NK/lymphoma cell stress.

### 730 **Declarations**

### 731 **Ethics approval**

732 Not applicable.

733

### 734 **Consent for publication**

735 Not applicable.

736

### 737 **Availability of data and materials**

738 The RNASeq data of NK cells have been deposited in the Gene Expression Omnibus (GEO)

739 data bank, accession code GSE114519.

740

### 741 **Competing interests**

742 The authors declare no competing financial interests.

743

### 744 **Funding**

745 This research was supported by startup funds from the Departments of Pathology, and National  
746 Cancer Institute (NCI) Grant (P30CA016056) involving the use of Roswell Park Comprehensive  
747 Cancer Centers (RPCCC)'s Genomics Shared Resources, Bioinformatics Shared Resources,  
748 Flow Cytometry and Imaging and Immune Analysis Facilities.

749

#### 750 **Author contributions**

751 BEB conceived the study and designed the experiments with contributions from SS. SS  
752 performed most of the experiments. BEB and SS wrote the manuscript. ECG and JW analyzed  
753 the RNASeq data and wrote the method for the same in the manuscript; other bioinformatics  
754 and statistical analysis was performed by BEB. SP performed cell viability assays with support  
755 from ESW. OM performed flow cytometry to test the purity of primary NK, CD4+ T and CD8+ T  
756 cells. PHB contributed toward performing the experiment with NK-92 cells. All authors read and  
757 approved the final manuscript.

#### 758 **Acknowledgements**

759 Flow Cytometry, RNASeq, Sanger sequencing and lentiviral knockdown of A3G in HuT78 T  
760 cells services were provided by the Flow and Image Cytometry, Genomics, and Gene  
761 Modulation Services, respectively at RPCCC's shared resources facility; which are partly  
762 supported by NCI Cancer Center Support Grant 5P30 CA016056. The following reagent was  
763 obtained through the NIH AIDS Reagent Program, Division of AIDS, NIAID, NIH: anti-ApoC17  
764 from Dr. Klaus Strebel.

765

766

#### 767 **References**



- 768 1. Eisenberg E, Levanon EY: **A-to-I RNA editing - immune protector and transcriptome**  
769 **diversifier**. *Nat Rev Genet* 2018.
- 770 2. Ramaswami G, Lin W, Piskol R, Tan MH, Davis C, Li JB: **Accurate identification of**  
771 **human Alu and non-Alu RNA editing sites**. *Nat Methods* 2012, **9**:579-581.
- 772 3. Levanon EY, Eisenberg E: **Does RNA editing compensate for Alu invasion of the**  
773 **primate genome?** *Bioessays* 2015, **37**:175-181.
- 774 4. Rosenthal JJ: **The emerging role of RNA editing in plasticity**. *J Exp Biol* 2015,  
775 **218**:1812-1821.
- 776 5. Balik A, Penn AC, Nemoda Z, Greger IH: **Activity-regulated RNA editing in select**  
777 **neuronal subfields in hippocampus**. *Nucleic Acids Res* 2013, **41**:1124-1134.
- 778 6. Nevo-Caspi Y, Amariglio N, Rechavi G, Paret G: **A-to-I RNA editing is induced upon**  
779 **hypoxia**. *Shock* 2011, **35**:585-589.
- 780 7. Buchumenski I, Bartok O, Ashwal-Fluss R, Pandey V, Porath HT, Levanon EY, Kadener  
781 **S: Dynamic hyper-editing underlies temperature adaptation in Drosophila**. *PLoS*  
782 *Genet* 2017, **13**:e1006931.
- 783 8. Garrett S, Rosenthal JJ: **RNA editing underlies temperature adaptation in K+**  
784 **channels from polar octopuses**. *Science* 2012, **335**:848-851.
- 785 9. Liew YJ, Li Y, Baumgarten S, Voolstra CR, Aranda M: **Condition-specific RNA editing**  
786 **in the coral symbiont Symbiodinium microadriaticum**. *PLoS Genet* 2017,  
787 **13**:e1006619.
- 788 10. Rieder LE, Savva YA, Reyna MA, Chang YJ, Dorsky JS, Rezaei A, Reenan RA:  
789 **Dynamic response of RNA editing to temperature in Drosophila**. *BMC Biol* 2015,  
790 **13**:1.
- 791 11. Teng B, Burant CF, Davidson NO: **Molecular cloning of an apolipoprotein B**  
792 **messenger RNA editing protein**. *Science* 1993, **260**:1816-1819.

- 793 12. Jarmuz A, Chester A, Bayliss J, Gisbourne J, Dunham I, Scott J, Navaratnam N: **An**  
794 **anthropoid-specific locus of orphan C to U RNA-editing enzymes on chromosome**  
795 **22. *Genomics* 2002, 79:285-296.**
- 796 13. Salter JD, Bennett RP, Smith HC: **The APOBEC Protein Family: United by Structure,**  
797 **Divergent in Function. *Trends Biochem Sci* 2016, 41:578-594.**
- 798 14. Harris RS, Dudley JP: **APOBECs and virus restriction. *Virology* 2015, 479-480:131-**  
799 **145.**
- 800 15. Sharma S, Patnaik SK, Taggart RT, Kannisto ED, Enriquez SM, Gollnick P, Baysal BE:  
801 **APOBEC3A cytidine deaminase induces RNA editing in monocytes and**  
802 **macrophages. *Nat Commun* 2015, 6:6881.**
- 803 16. Sheehy AM, Gaddis NC, Choi JD, Malim MH: **Isolation of a human gene that inhibits**  
804 **HIV-1 infection and is suppressed by the viral Vif protein. *Nature* 2002, 418:646-**  
805 **650.**
- 806 17. Sharma S, Patnaik SK, Taggart RT, Baysal BE: **The double-domain cytidine**  
807 **deaminase APOBEC3G is a cellular site-specific RNA editing enzyme. *Sci Rep***  
808 **2016, 6:39100.**
- 809 18. Mabbott NA, Baillie JK, Brown H, Freeman TC, Hume DA: **An expression atlas of**  
810 **human primary cells: inference of gene function from coexpression networks.**  
811 ***BMC Genomics* 2013, 14:632.**
- 812 19. Su AI, Wiltshire T, Batalov S, Lapp H, Ching KA, Block D, Zhang J, Soden R, Hayakawa  
813 M, Kreiman G, et al: **A gene atlas of the mouse and human protein-encoding**  
814 **transcriptomes. *Proc Natl Acad Sci U S A* 2004, 101:6062-6067.**
- 815 20. Abbas AR, Baldwin D, Ma Y, Ouyang W, Gurney A, Martin F, Fong S, van Lookeren  
816 Campagne M, Godowski P, Williams PM, et al: **Immune response in silico (IRIS):**

- 817 **immune-specific genes identified from a compendium of microarray expression**  
818 **data.** *Genes Immun* 2005, **6**:319-331.
- 819 21. Kreisberg JF, Yonemoto W, Greene WC: **Endogenous factors enhance HIV infection**  
820 **of tissue naive CD4 T cells by stimulating high molecular mass APOBEC3G**  
821 **complex formation.** *J Exp Med* 2006, **203**:865-870.
- 822 22. Vetter ML, Johnson ME, Antons AK, Unutmaz D, D'Aquila RT: **Differences in**  
823 **APOBEC3G expression in CD4+ T helper lymphocyte subtypes modulate HIV-1**  
824 **infectivity.** *PLoS Pathog* 2009, **5**:e1000292.
- 825 23. Koning FA, Newman EN, Kim EY, Kunstman KJ, Wolinsky SM, Malim MH: **Defining**  
826 **APOBEC3 expression patterns in human tissues and hematopoietic cell subsets.** *J*  
827 *Virology* 2009, **83**:9474-9485.
- 828 24. Refsland EW, Stenglein MD, Shindo K, Albin JS, Brown WL, Harris RS: **Quantitative**  
829 **profiling of the full APOBEC3 mRNA repertoire in lymphocytes and tissues:**  
830 **implications for HIV-1 restriction.** *Nucleic Acids Res* 2010, **38**:4274-4284.
- 831 25. Baysal BE, De Jong K, Liu B, Wang J, Patnaik SK, Wallace PK, Taggart RT: **Hypoxia-**  
832 **inducible C-to-U coding RNA editing downregulates SDHB in monocytes.** *PeerJ*  
833 2013, **1**:e152.
- 834 26. Koumenis C, Naczki C, Koritzinsky M, Rastani S, Diehl A, Sonenberg N, Koromilas A,  
835 Wouters BG: **Regulation of protein synthesis by hypoxia via activation of the**  
836 **endoplasmic reticulum kinase PERK and phosphorylation of the translation**  
837 **initiation factor eIF2alpha.** *Mol Cell Biol* 2002, **22**:7405-7416.
- 838 27. Sharma S, Baysal BE: **Stem-loop structure preference for site-specific RNA editing**  
839 **by APOBEC3A and APOBEC3G.** *PeerJ* 2017, **5**:e4136.

- 840 28. Sharma S, Patnaik SK, Kemer Z, Baysal BE: **Transient overexpression of exogenous**  
841 **APOBEC3A causes C-to-U RNA editing of thousands of genes.** *RNA Biol* 2017,  
842 **14:603-610.**
- 843 29. Liu L, Cash TP, Jones RG, Keith B, Thompson CB, Simon MC: **Hypoxia-induced**  
844 **energy stress regulates mRNA translation and cell growth.** *Mol Cell* 2006, **21:521-**  
845 **531.**
- 846 30. Spriggs KA, Bushell M, Willis AE: **Translational regulation of gene expression during**  
847 **conditions of cell stress.** *Mol Cell* 2010, **40:228-237.**
- 848 31. Daugaard M, Rohde M, Jaattela M: **The heat shock protein 70 family: Highly**  
849 **homologous proteins with overlapping and distinct functions.** *FEBS Lett* 2007,  
850 **581:3702-3710.**
- 851 32. Hai T, Wolfgang CD, Marsee DK, Allen AE, Sivaprasad U: **ATF3 and stress**  
852 **responses.** *Gene Expr* 1999, **7:321-335.**
- 853 33. Kaelin WG, Jr., Ratcliffe PJ: **Oxygen sensing by metazoans: the central role of the**  
854 **HIF hydroxylase pathway.** *Mol Cell* 2008, **30:393-402.**
- 855 34. Sharma S, Wang J, Cortes Gomez E, Taggart RT, Baysal BE: **Mitochondrial complex**  
856 **II regulates a distinct oxygen sensing mechanism in monocytes.** *Hum Mol Genet*  
857 **2017, 26:1328-1339.**
- 858 35. Osowski CM, Urano F: **Measuring ER stress and the unfolded protein response**  
859 **using mammalian tissue culture system.** *Methods Enzymol* 2011, **490:71-92.**
- 860 36. Thastrup O, Cullen PJ, Drobak BK, Hanley MR, Dawson AP: **Thapsigargin, a tumor**  
861 **promoter, discharges intracellular Ca<sup>2+</sup> stores by specific inhibition of the**  
862 **endoplasmic reticulum Ca<sup>2+</sup>(+)-ATPase.** *Proc Natl Acad Sci U S A* 1990, **87:2466-**  
863 **2470.**

- 864 37. Goda N, Ryan HE, Khadivi B, McNulty W, Rickert RC, Johnson RS: **Hypoxia-inducible**  
865 **factor 1alpha is essential for cell cycle arrest during hypoxia.** *Mol Cell Biol* 2003,  
866 **23:359-369.**
- 867 38. Blanc V, Park E, Schaefer S, Miller M, Lin Y, Kennedy S, Billing AM, Ben Hamidane H,  
868 Graumann J, Mortazavi A, et al: **Genome-wide identification and functional analysis**  
869 **of APOBEC1-mediated C-to-U RNA editing in mouse small intestine and liver.**  
870 *Genome Biol* 2014, **15**:R79.
- 871 39. Levanon EY, Eisenberg E, Yelin R, Nemzer S, Hallegger M, Shemesh R, Fligelman ZY,  
872 Shoshan A, Pollock SR, Sztybel D, et al: **Systematic identification of abundant A-to-I**  
873 **editing sites in the human transcriptome.** *Nat Biotechnol* 2004, **22**:1001-1005.
- 874 40. Rosenberg BR, Hamilton CE, Mwangi MM, Dewell S, Papavasiliou FN: **Transcriptome-**  
875 **wide sequencing reveals numerous APOBEC1 mRNA-editing targets in transcript**  
876 **3' UTRs.** *Nat Struct Mol Biol* 2011, **18**:230-236.
- 877 41. Anderson LL, Mao X, Scott BA, Crowder CM: **Survival from hypoxia in C. elegans by**  
878 **inactivation of aminoacyl-tRNA synthetases.** *Science* 2009, **323**:630-633.
- 879 42. Lee AS, Kranzusch PJ, Cate JH: **eIF3 targets cell-proliferation messenger RNAs for**  
880 **translational activation or repression.** *Nature* 2015, **522**:111-114.
- 881 43. Shah M, Su D, Scheliga JS, Pluskal T, Boronat S, Motamedchaboki K, Campos AR, Qi  
882 F, Hidalgo E, Yanagida M, Wolf DA: **A Transcript-Specific eIF3 Complex Mediates**  
883 **Global Translational Control of Energy Metabolism.** *Cell Rep* 2016, **16**:1891-1902.
- 884 44. Hershey JW: **The role of eIF3 and its individual subunits in cancer.** *Biochim Biophys*  
885 *Acta* 2015, **1849**:792-800.
- 886 45. Roobol A, Carden MJ, Newsam RJ, Smales CM: **Biochemical insights into the**  
887 **mechanisms central to the response of mammalian cells to cold stress and**  
888 **subsequent rewarming.** *FEBS J* 2009, **276**:286-302.

- 889 46. Liberti MV, Locasale JW: **The Warburg Effect: How Does it Benefit Cancer Cells?**  
890 *Trends Biochem Sci* 2016, **41**:211-218.
- 891 47. Huang Y, de Reynies A, de Leval L, Ghazi B, Martin-Garcia N, Travert M, Bosq J, Briere  
892 J, Petit B, Thomas E, et al: **Gene expression profiling identifies emerging oncogenic**  
893 **pathways operating in extranodal NK/T-cell lymphoma, nasal type.** *Blood* 2010,  
894 **115**:1226-1237.
- 895 48. Hasmim M, Messai Y, Ziani L, Thiery J, Bouhris JH, Noman MZ, Chouaib S: **Critical**  
896 **Role of Tumor Microenvironment in Shaping NK Cell Functions: Implication of**  
897 **Hypoxic Stress.** *Front Immunol* 2015, **6**:482.
- 898 49. Taylor CT: **Mitochondria and cellular oxygen sensing in the HIF pathway.** *Biochem J*  
899 2008, **409**:19-26.
- 900 50. Baysal BE, Ferrell RE, Willett-Brozick JE, Lawrence EC, Myssiorek D, Bosch A, van der  
901 Mey A, Taschner PE, Rubinstein WS, Myers EN, et al: **Mutations in SDHD, a**  
902 **mitochondrial complex II gene, in hereditary paraganglioma.** *Science* 2000,  
903 **287**:848-851.
- 904 51. Lopez-Barneo J, Gonzalez-Rodriguez P, Gao L, Fernandez-Aguera MC, Pardal R,  
905 Ortega-Saenz P: **Oxygen sensing by the carotid body: mechanisms and role in**  
906 **adaptation to hypoxia.** *Am J Physiol Cell Physiol* 2016, **310**:C629-642.
- 907 52. Michelakis ED, Thebaud B, Weir EK, Archer SL: **Hypoxic pulmonary**  
908 **vasoconstriction: redox regulation of O<sub>2</sub>-sensitive K<sup>+</sup> channels by a mitochondrial**  
909 **O<sub>2</sub>-sensor in resistance artery smooth muscle cells.** *J Mol Cell Cardiol* 2004,  
910 **37**:1119-1136.
- 911 53. Angelova PR, Kasymov V, Christie I, Sheikhabaei S, Turovsky E, Marina N, Korsak A,  
912 Zwicker J, Teschemacher AG, Ackland GL, et al: **Functional Oxygen Sensitivity of**  
913 **Astrocytes.** *J Neurosci* 2015, **35**:10460-10473.

- 914 54. Sawyer SL, Emerman M, Malik HS: **Ancient adaptive evolution of the primate**  
915 **antiviral DNA-editing enzyme APOBEC3G.** *PLoS Biol* 2004, **2**:E275.
- 916 55. Zhang J, Webb DM: **Rapid evolution of primate antiviral enzyme APOBEC3G.** *Hum*  
917 *Mol Genet* 2004, **13**:1785-1791.
- 918 56. Mikl MC, Watt IN, Lu M, Reik W, Davies SL, Neuberger MS, Rada C: **Mice deficient in**  
919 **APOBEC2 and APOBEC3.** *Mol Cell Biol* 2005, **25**:7270-7277.
- 920 57. Andrews S, Gilley J, Coleman MP: **Difference Tracker: ImageJ plugins for fully**  
921 **automated analysis of multiple axonal transport parameters.** *J Neurosci Methods*  
922 2010, **193**:281-287.
- 923 58. Trapnell C, Pachter L, Salzberg SL: **TopHat: discovering splice junctions with RNA-**  
924 **Seq.** *Bioinformatics* 2009, **25**:1105-1111.
- 925 59. Wang L, Wang S, Li W: **RSeQC: quality control of RNA-seq experiments.**  
926 *Bioinformatics* 2012, **28**:2184-2185.
- 927 60. Sherry ST, Ward MH, Kholodov M, Baker J, Phan L, Smigielski EM, Sirotkin K: **dbSNP:**  
928 **the NCBI database of genetic variation.** *Nucleic Acids Res* 2001, **29**:308-311.
- 929 61. Yang H, Wang K: **Genomic variant annotation and prioritization with ANNOVAR**  
930 **and wANNOVAR.** *Nat Protoc* 2015, **10**:1556-1566.
- 931 62. Anders S, Pyl PT, Huber W: **HTSeq--a Python framework to work with high-**  
932 **throughput sequencing data.** *Bioinformatics* 2015, **31**:166-169.
- 933 63. Love MI, Huber W, Anders S: **Moderated estimation of fold change and dispersion**  
934 **for RNA-seq data with DESeq2.** *Genome Biol* 2014, **15**:550.
- 935 64. Kao S, Miyagi E, Khan MA, Takeuchi H, Opi S, Goila-Gaur R, Strebel K: **Production of**  
936 **infectious human immunodeficiency virus type 1 does not require depletion of**  
937 **APOBEC3G from virus-producing cells.** *Retrovirology* 2004, **1**:27.

- 938 65. Khan MA, Kao S, Miyagi E, Takeuchi H, Goila-Gaur R, Opi S, Gipson CL, Parslow TG,  
939 Ly H, Strebel K: **Viral RNA is required for the association of APOBEC3G with**  
940 **human immunodeficiency virus type 1 nucleoprotein complexes.** *J Virol* 2005,  
941 **79:5870-5874.**
- 942 66. Crooks GE, Hon G, Chandonia JM, Brenner SE: **WebLogo: a sequence logo**  
943 **generator.** *Genome Res* 2004, **14:1188-1190.**
- 944



**Figure 1**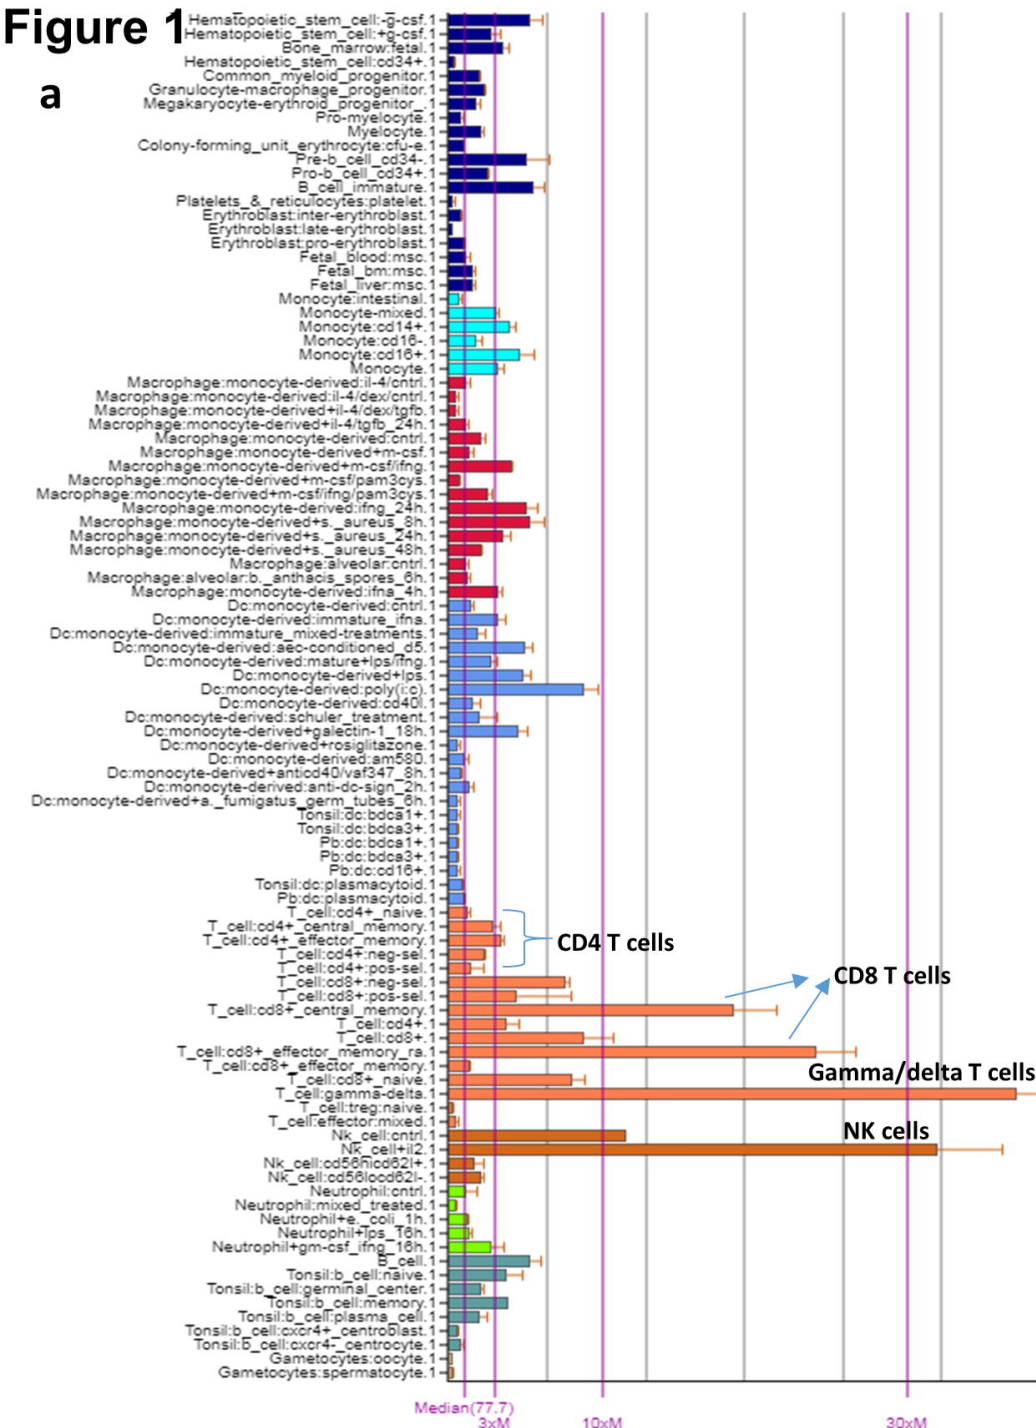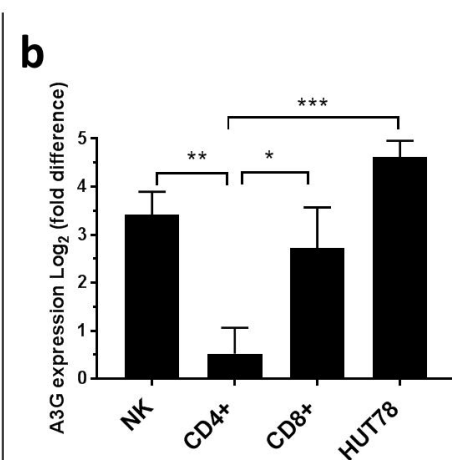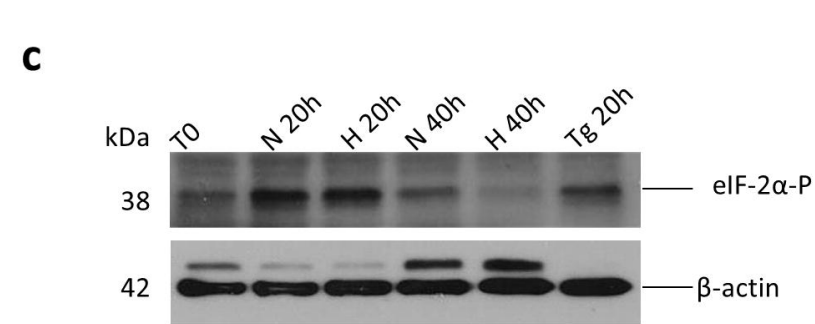

**d** T0 NK cells Cellular crowding and/or hypoxia Treated NK cells

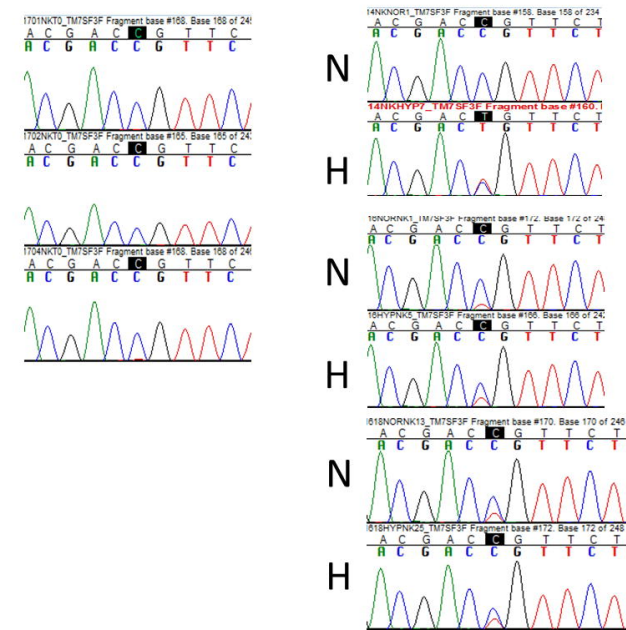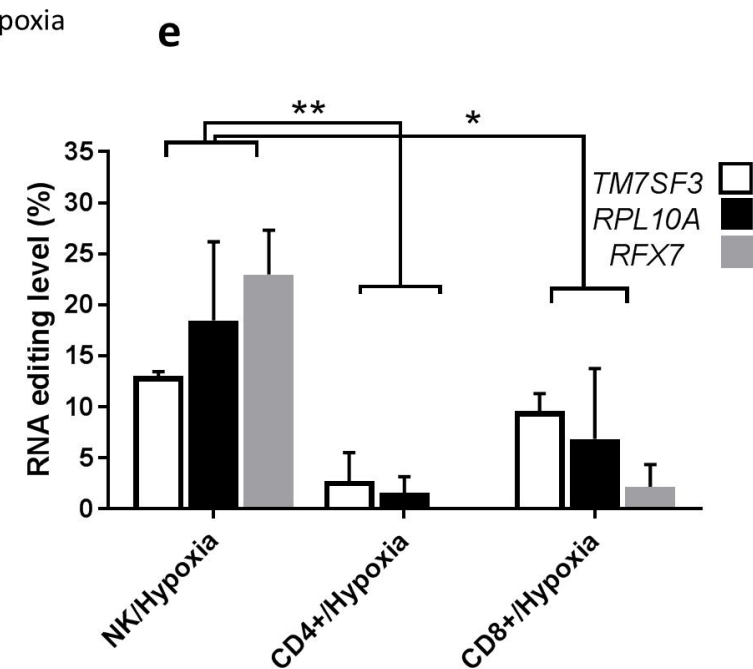

**Figure 2**

**a**

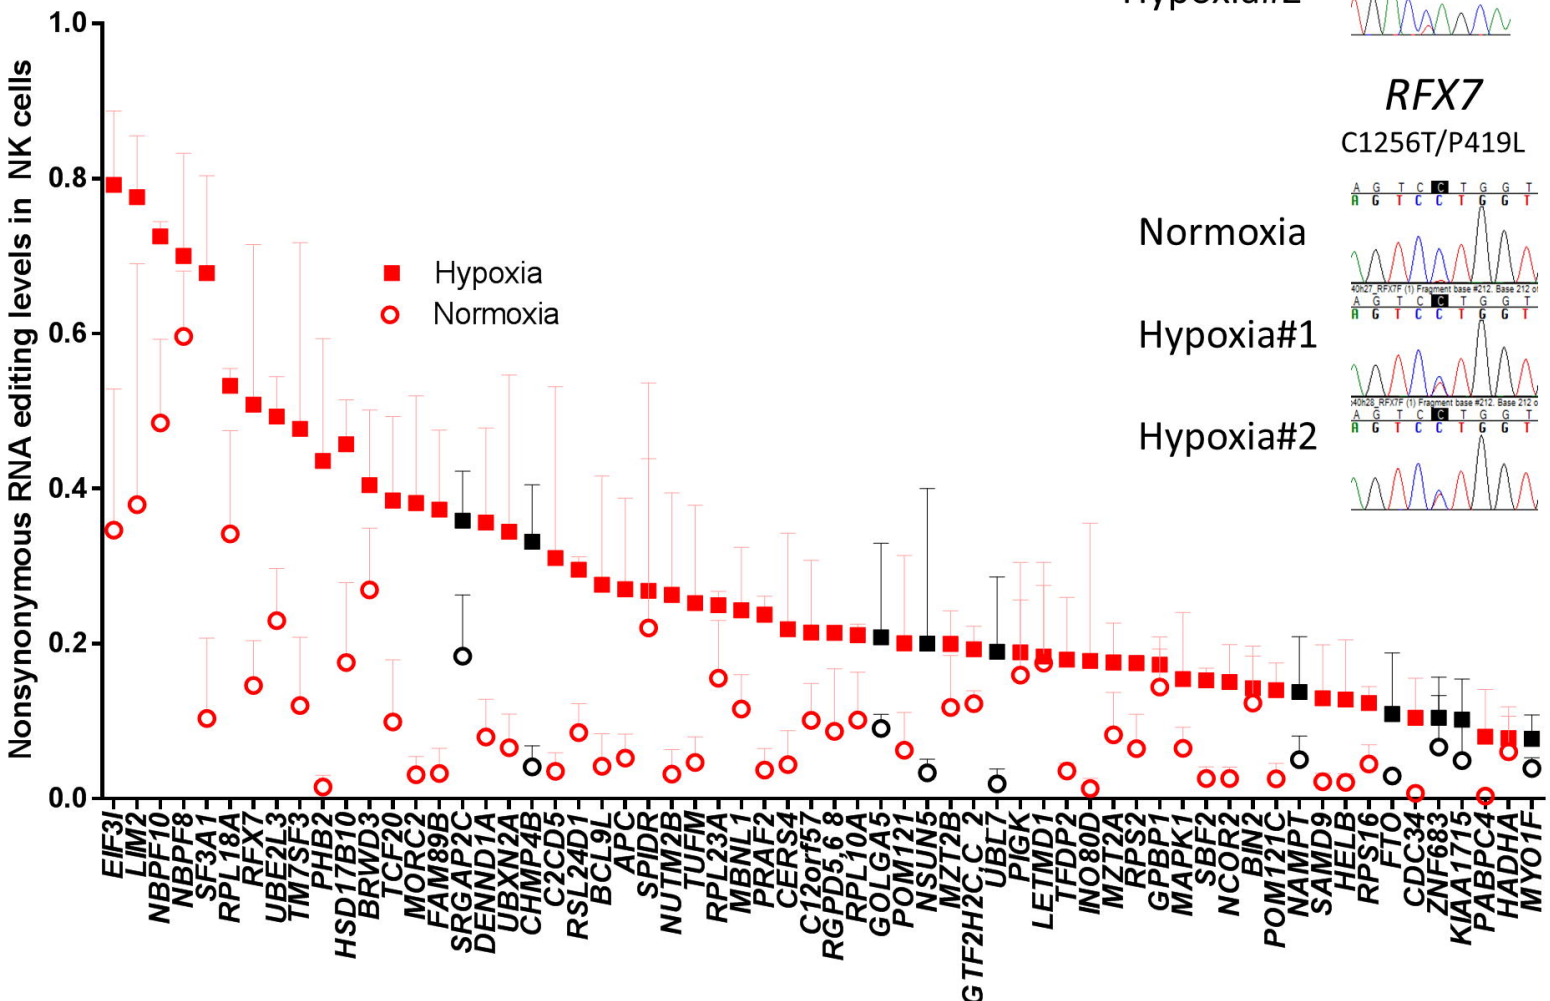

**b**

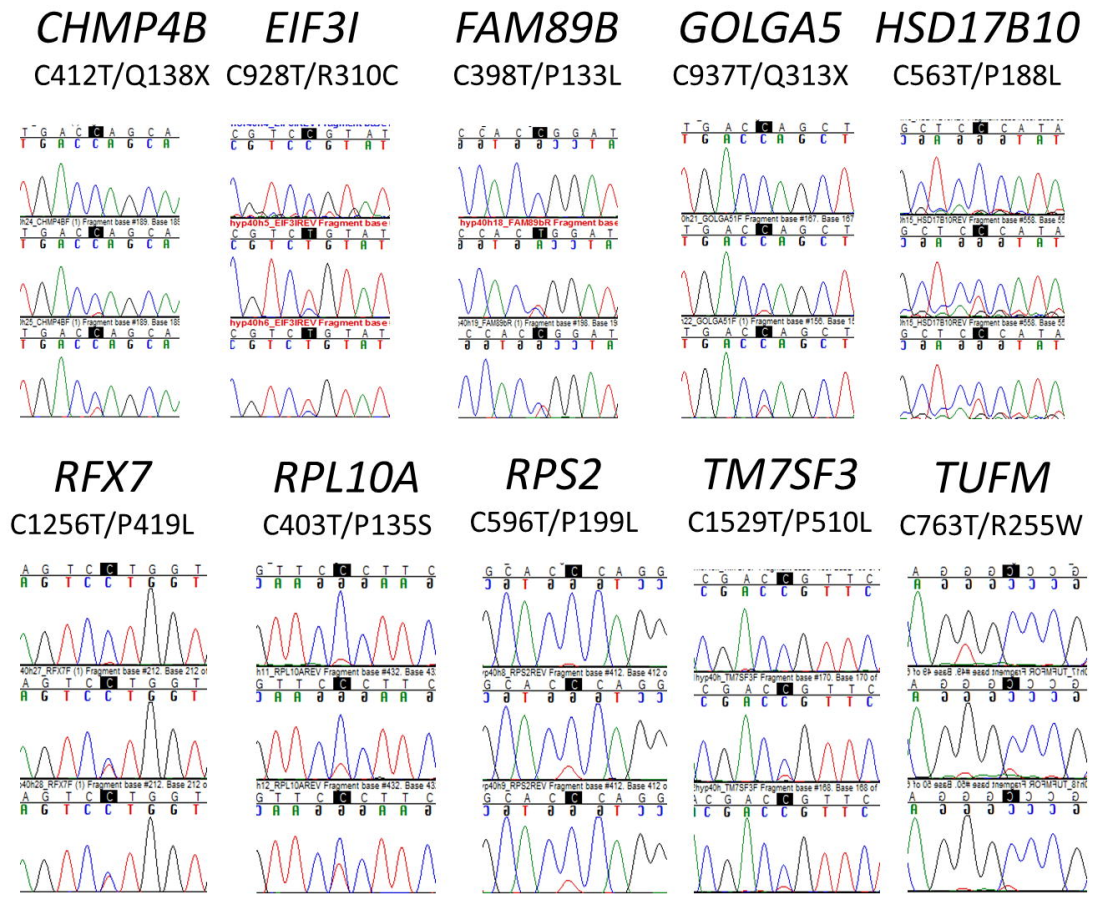

**Figure 2 (contd.)**

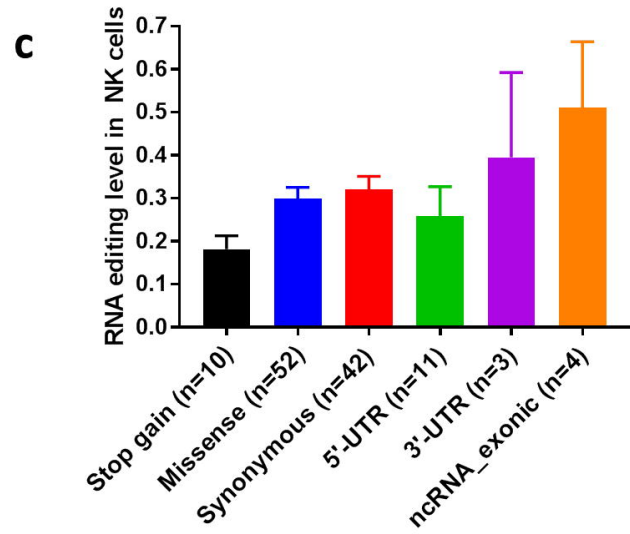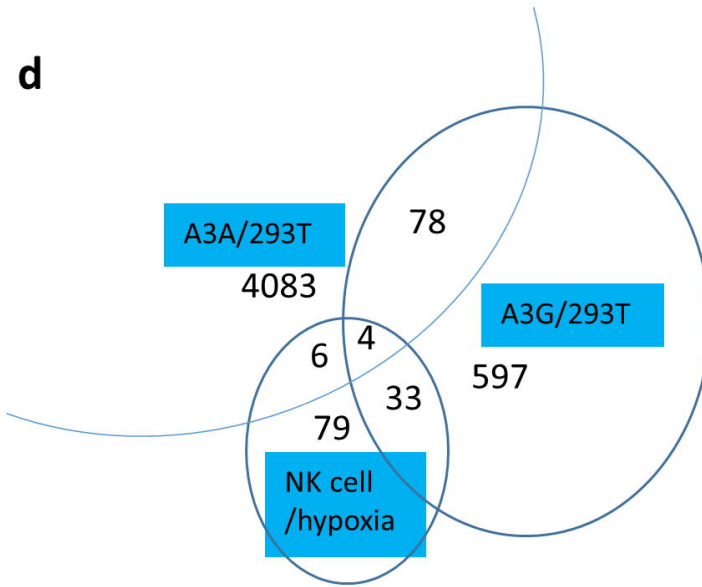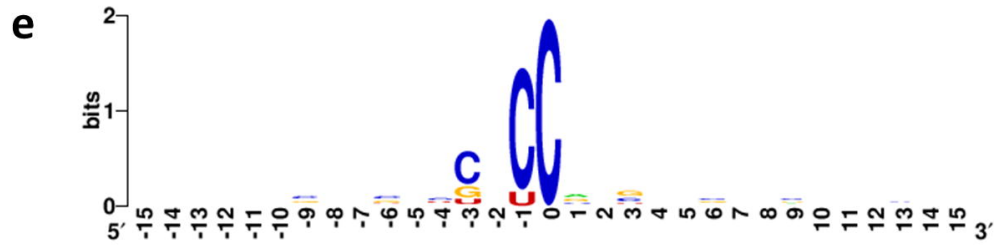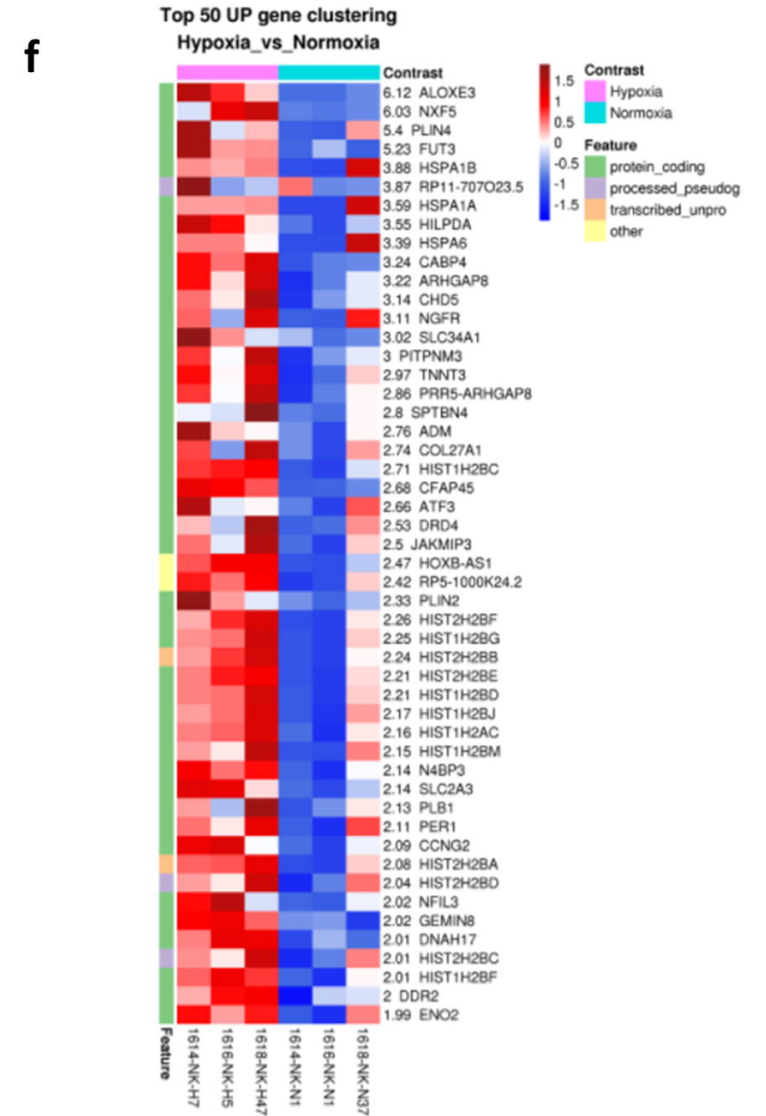



**Figure 3****a**

| Gene                                       | APOBEC3G |
|--------------------------------------------|----------|
| SNU869_BILIARY_TRACT                       | 13.86247 |
| BHT101_THYROID                             | 13.29739 |
| 697_HAEMATOPOIETIC_AND_LYMPHOID_TISSUE     | 12.97024 |
| EHEB_HAEMATOPOIETIC_AND_LYMPHOID_TISSUE    | 12.70465 |
| KOPN8_HAEMATOPOIETIC_AND_LYMPHOID_TISSUE   | 12.67574 |
| JVM3_HAEMATOPOIETIC_AND_LYMPHOID_TISSUE    | 12.47231 |
| KE97_HAEMATOPOIETIC_AND_LYMPHOID_TISSUE    | 12.46559 |
| HUT78_HAEMATOPOIETIC_AND_LYMPHOID_TISSUE   | 12.46496 |
| L428_HAEMATOPOIETIC_AND_LYMPHOID_TISSUE    | 12.45416 |
| HUT102_HAEMATOPOIETIC_AND_LYMPHOID_TISSUE  | 12.44722 |
| BDCM_HAEMATOPOIETIC_AND_LYMPHOID_TISSUE    | 12.29956 |
| A4FUK_HAEMATOPOIETIC_AND_LYMPHOID_TISSUE   | 12.28637 |
| OCIM1_HAEMATOPOIETIC_AND_LYMPHOID_TISSUE   | 12.27291 |
| NALM6_HAEMATOPOIETIC_AND_LYMPHOID_TISSUE   | 12.19849 |
| HS611T_HAEMATOPOIETIC_AND_LYMPHOID_TISSUE  | 12.18634 |
| KMS21BM_HAEMATOPOIETIC_AND_LYMPHOID_TISSUE | 12.16398 |
| COLO775_HAEMATOPOIETIC_AND_LYMPHOID_TISSUE | 12.15647 |
| SEM_HAEMATOPOIETIC_AND_LYMPHOID_TISSUE     | 12.09211 |

**c**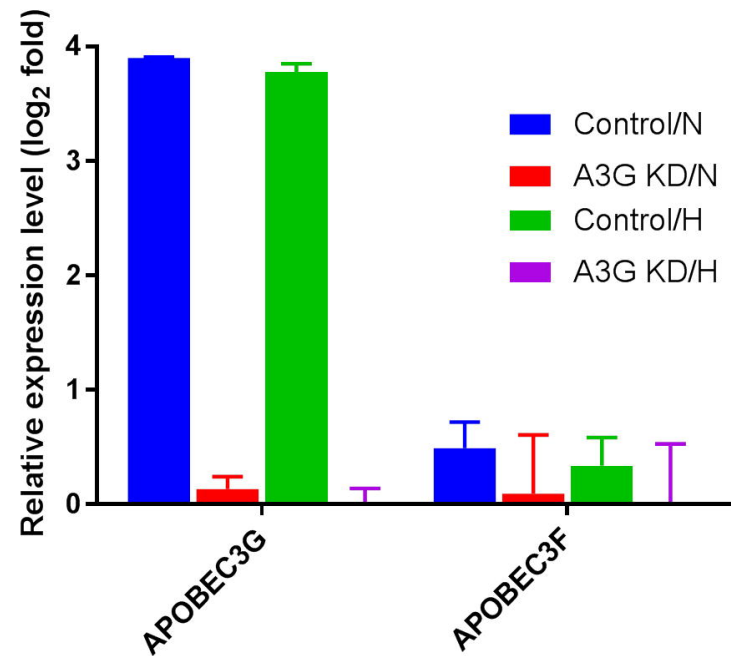**b**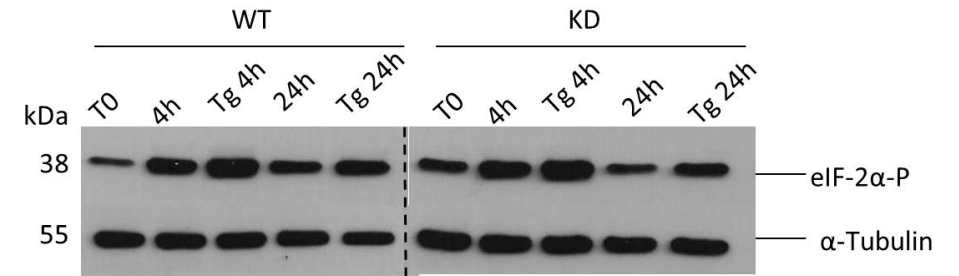**d**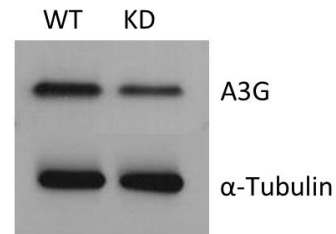**e**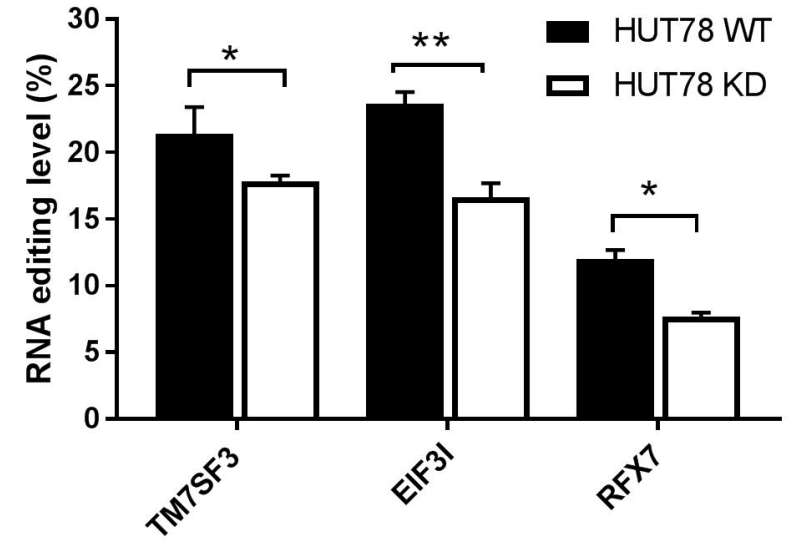

**Figure 4**

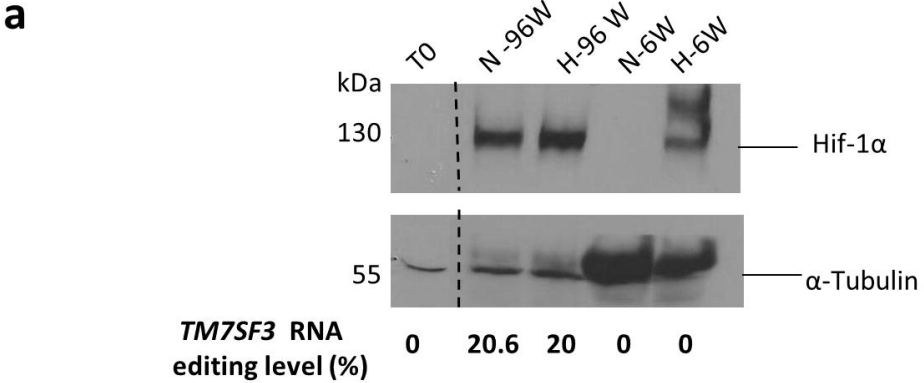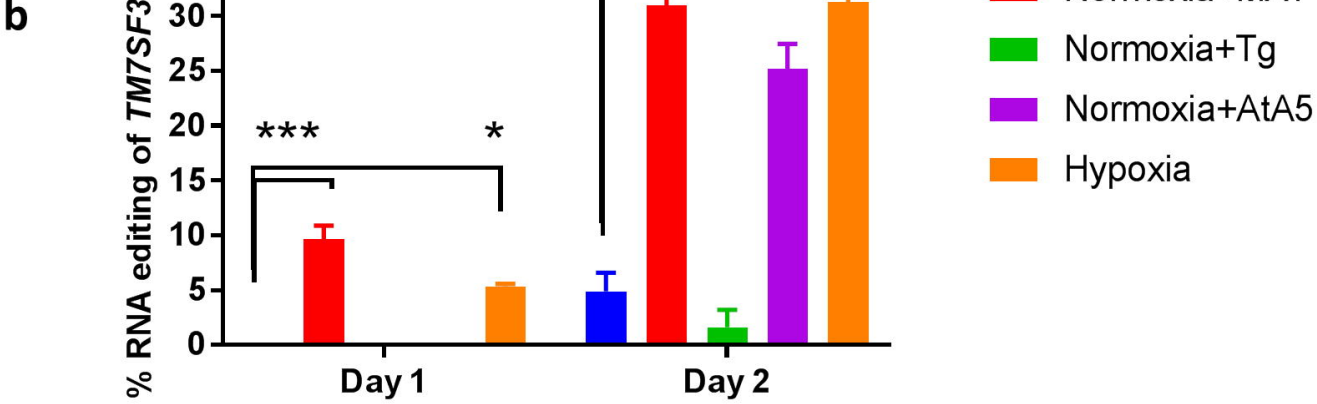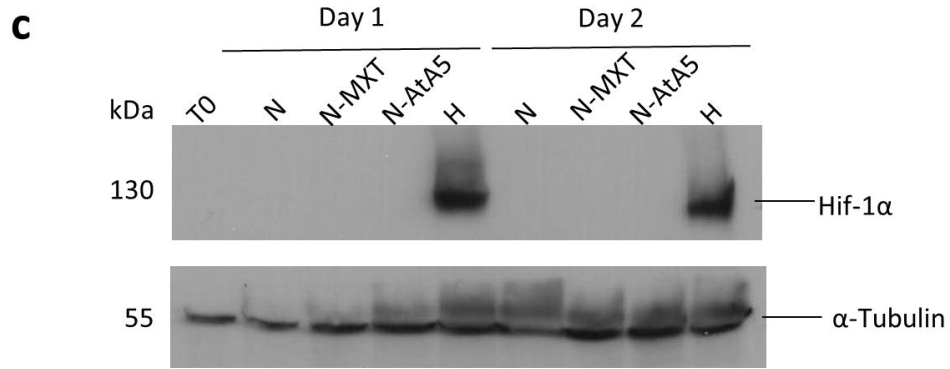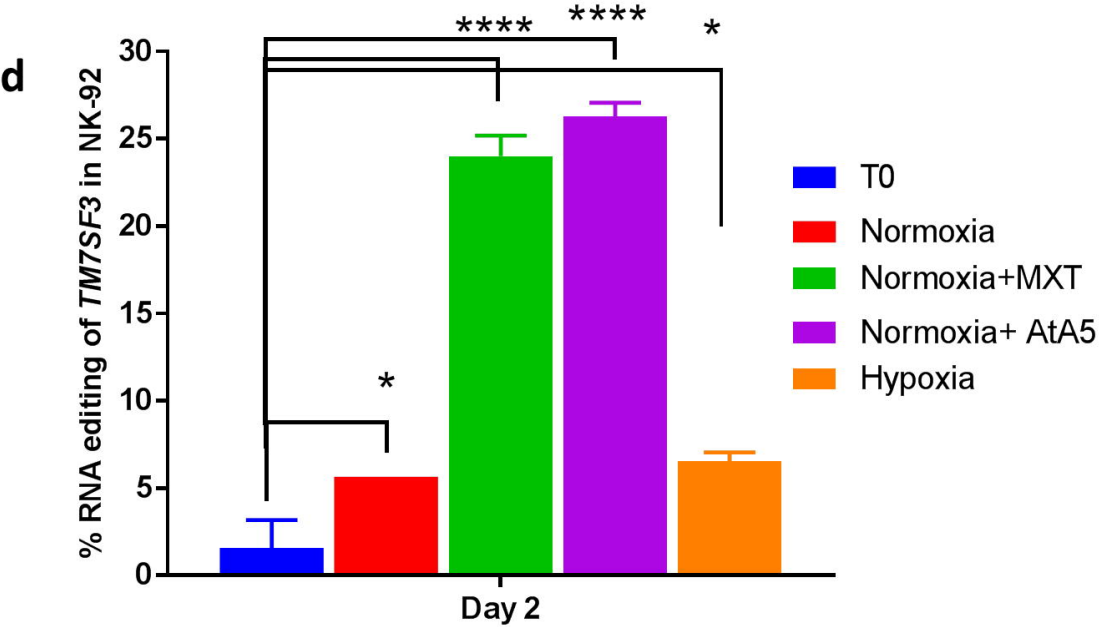

**Figure 5**

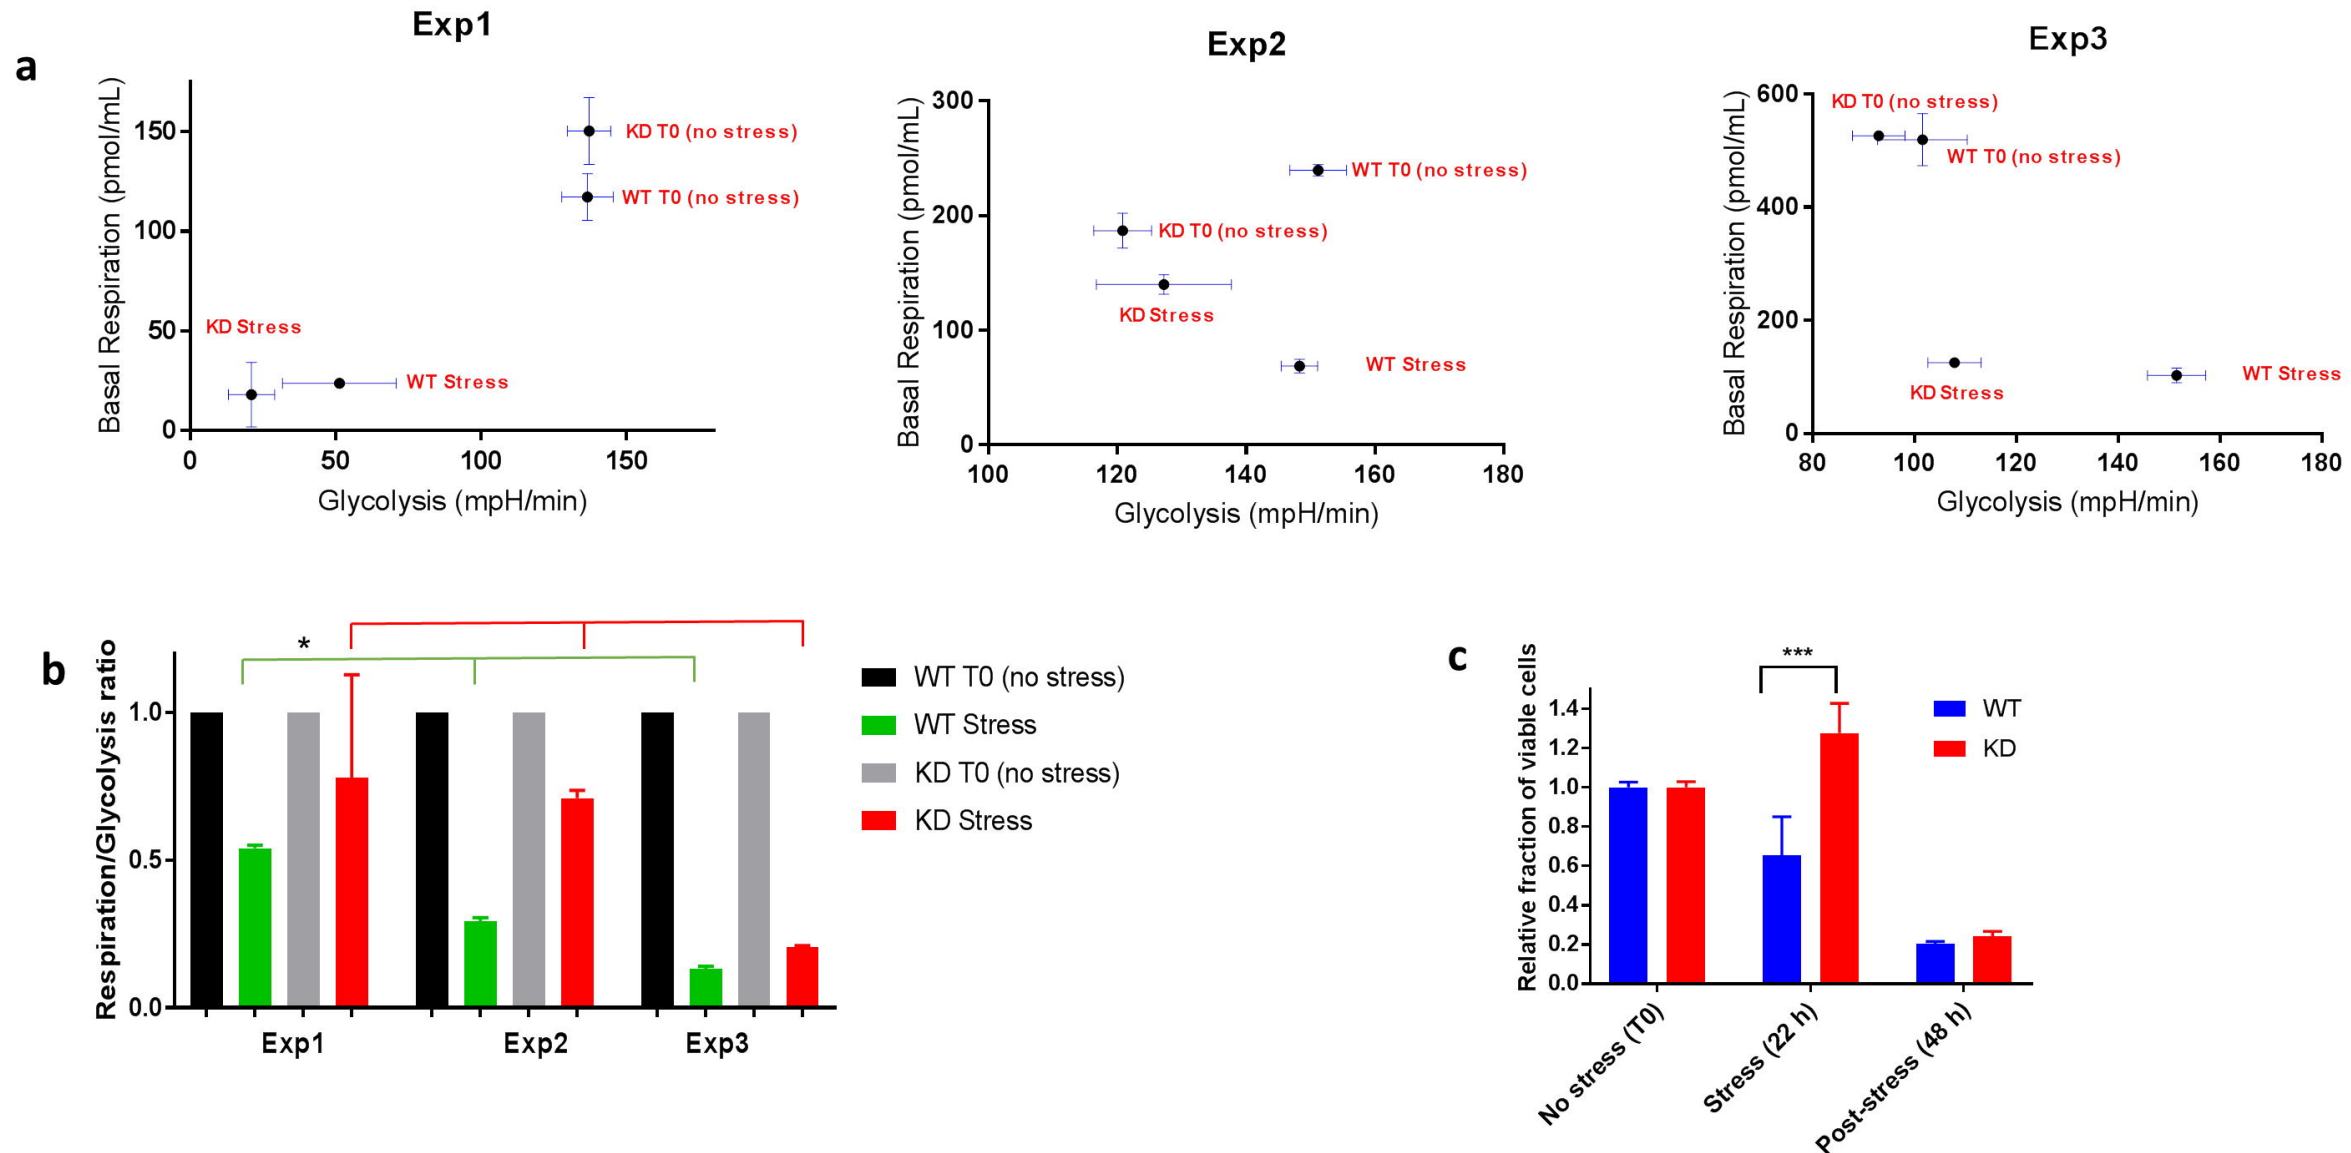

NK cell/cell line (unstressed)

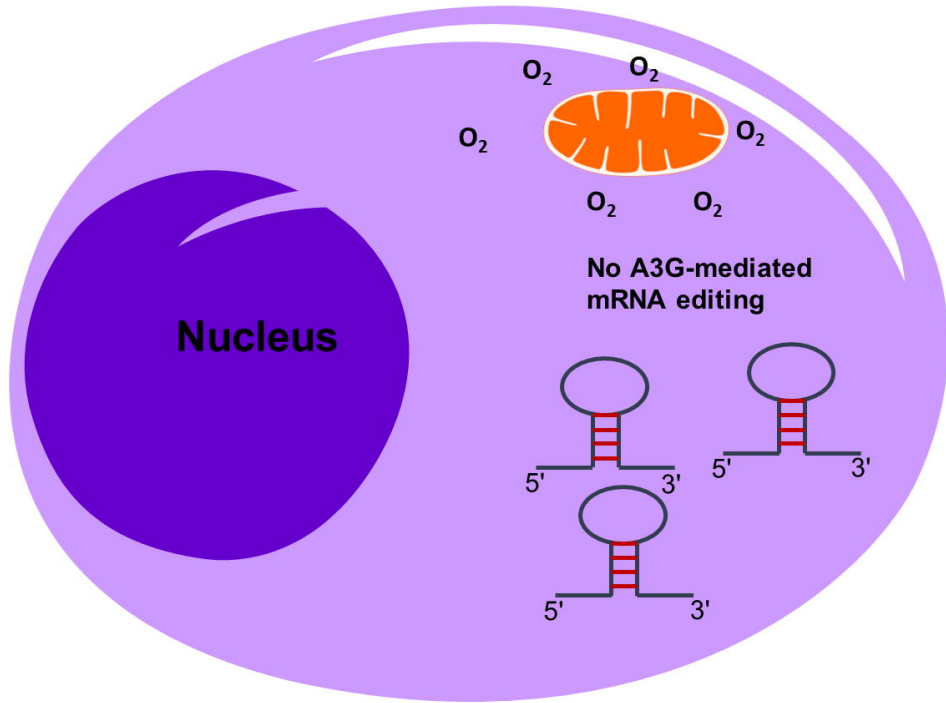

Hypoxic cell stress

Mitochondrial respiratory inhibition

NK cell/cell line (stressed)

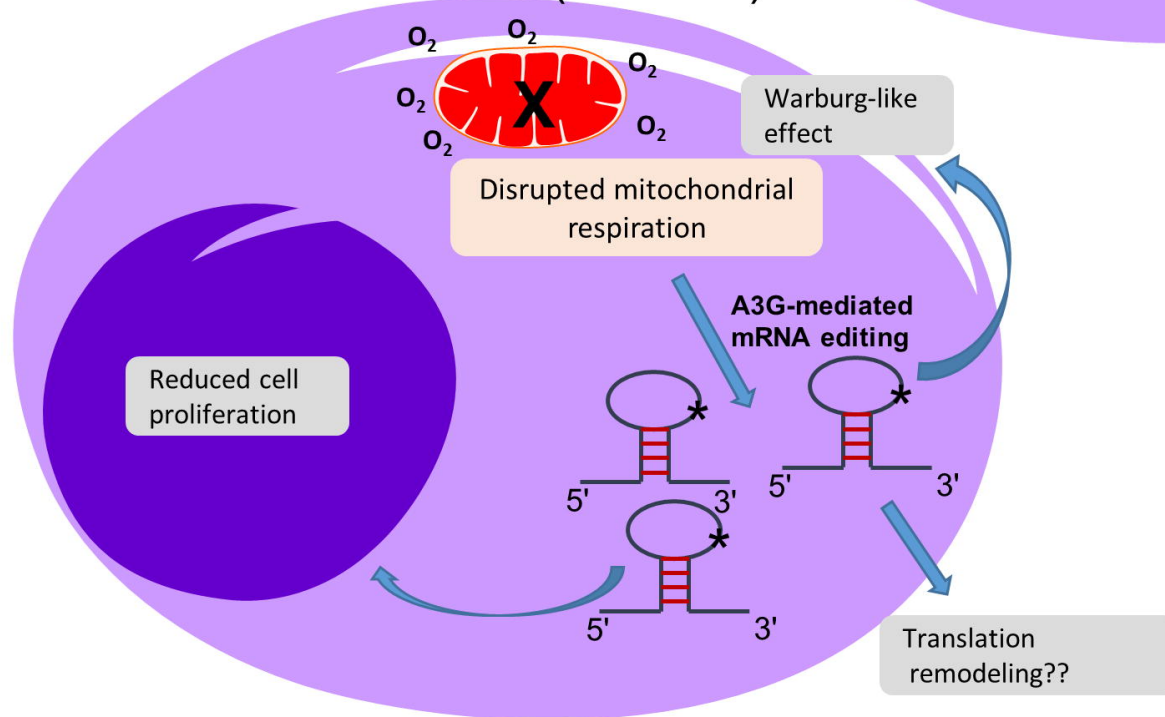

NK cell/cell line (stressed)

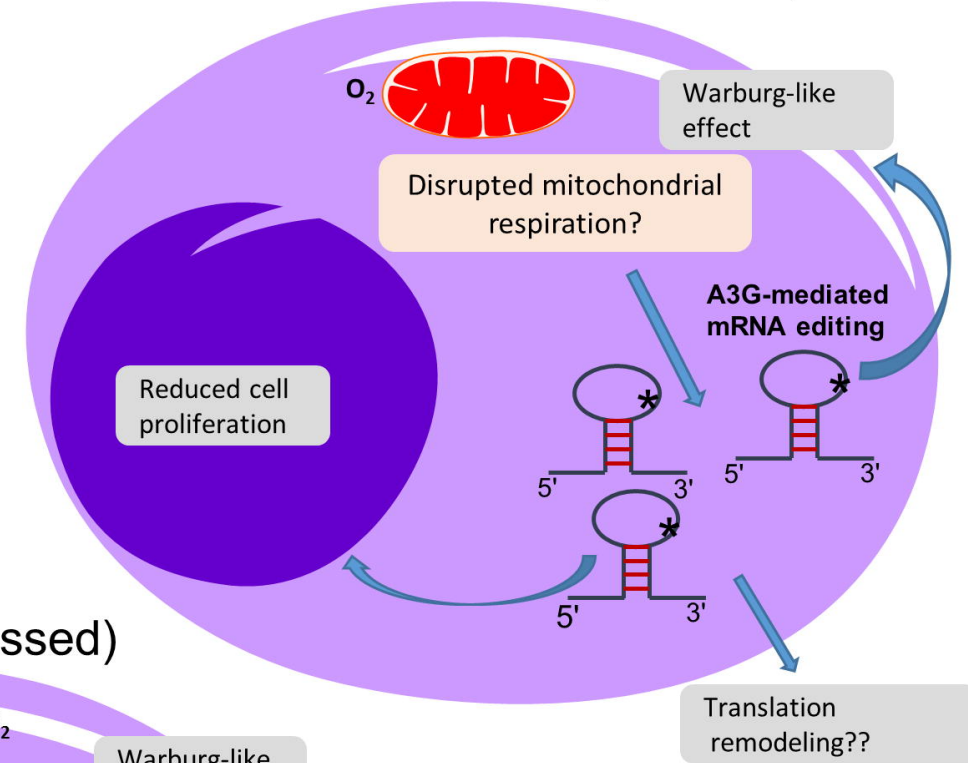

Source: http://biorxiv.org/content/10.1101/389791v1.full.pdf
